# Supplementary material for: Quality of life, sleep and rheumatoid arthritis (QUASAR): a protocol for a prospective UK mHealth study to investigate the relationship between sleep and quality of life in adults with rheumatoid arthritis
Source: PubMed Central journal article supplement — BMJ Open. 2018 Jan 26;8(1):e018752. doi: 10.1136/bmjopen-2017-018752 (PMC5829597; doi:10.1136/bmjopen-2017-018752), 2018-01-26
Supplement: bmjopen-2017-018752.draft_revisions.pdf [file bmjopen-2017-018752.draft_revisions.pdf]

# BMJ Open

BMJ Open is committed to open peer review. As part of this commitment we make the peer review history of every article we publish publicly available.

When an article is published we post the peer reviewers' comments and the authors' responses online. We also post the versions of the paper that were used during peer review. These are the versions that the peer review comments apply to.

The versions of the paper that follow are the versions that were submitted during the peer review process. They are not the versions of record or the final published versions. They should not be cited or distributed as the published version of this manuscript.

BMJ Open is an open access journal and the full, final, typeset and author-corrected version of record of the manuscript is available on our site with no access controls, subscription charges or pay-per-view fees (<http://bmjopen.bmj.com>).

If you have any questions on BMJ Open's open peer review process please email [editorial.bmjopen@bmj.com](mailto:editorial.bmjopen@bmj.com)

# BMJ Open

## Quality of life, sleep and rheumatoid arthritis (QUASAR): A protocol for a prospective mHealth study.

|                               |                                                                                                                                                                                                                                                                                                                                                                                                                                                                                                                                                                                                                                                                              |
|-------------------------------|------------------------------------------------------------------------------------------------------------------------------------------------------------------------------------------------------------------------------------------------------------------------------------------------------------------------------------------------------------------------------------------------------------------------------------------------------------------------------------------------------------------------------------------------------------------------------------------------------------------------------------------------------------------------------|
| Journal:                      | <i>BMJ Open</i>                                                                                                                                                                                                                                                                                                                                                                                                                                                                                                                                                                                                                                                              |
| Manuscript ID                 | bmjopen-2017-018752                                                                                                                                                                                                                                                                                                                                                                                                                                                                                                                                                                                                                                                          |
| Article Type:                 | Protocol                                                                                                                                                                                                                                                                                                                                                                                                                                                                                                                                                                                                                                                                     |
| Date Submitted by the Author: | 19-Jul-2017                                                                                                                                                                                                                                                                                                                                                                                                                                                                                                                                                                                                                                                                  |
| Complete List of Authors:     | Druce, Katie; University of Manchester, Arthritis Research UK Centre for Epidemiology<br>Cordingley, Lis; Manchester University<br>Short, Vicky; University of Manchester, Arthritis Research UK Centre for Epidemiology<br>Moore, Susan; University of Manchester, Arthritis Research UK Centre for Epidemiology<br>Hellman, Bruce; uMotif<br>Lunt, Mark; University of Manchester, ARC Epidemiology Unit<br>Kyle, Simon; University of Oxford, Sleep and Circadian Neuroscience Institute<br>Dixon, Will; University of Manchester, Arthritis Research UK Centre for Epidemiology<br>McBeth, John; University of Manchester, Arthritis Research UK Centre for Epidemiology |
| Keywords:                     | SLEEP MEDICINE, RHEUMATOLOGY, EPIDEMIOLOGY                                                                                                                                                                                                                                                                                                                                                                                                                                                                                                                                                                                                                                   |
|                               |                                                                                                                                                                                                                                                                                                                                                                                                                                                                                                                                                                                                                                                                              |

SCHOLARONE™  
Manuscripts

only

1  
2  
3 Quality of life, sleep and rheumatoid arthritis (QUASAR): A protocol for a prospective mHealth study.

4  
5 Druce KL<sup>1\*</sup>, Cordingley L<sup>2</sup>, Short V<sup>1</sup>, Moore S<sup>1</sup>, Hellman B<sup>3</sup>, Lunt M<sup>1</sup>, Kyle S.D.<sup>4</sup>, Dixon WG<sup>1,5</sup>, McBeth  
6 J<sup>1,5</sup>  
7

8  
9 <sup>1</sup> Arthritis Research UK Centre for Epidemiology, University of Manchester, Manchester, UK.

10  
11  
12 <sup>2</sup> Division of Musculoskeletal and Dermatological Sciences, University of Manchester, Manchester UK

13  
14  
15 <sup>3</sup> uMotif, London, UK

16  
17  
18 <sup>4</sup> Sleep and Circadian Neuroscience Institute, Nuffield Department of Clinical Neurosciences.  
19 University of Oxford, Oxford, UK.

20  
21  
22 <sup>5</sup> NIHR Manchester Musculoskeletal Biomedical Research Unit, Central Manchester, Manchester, UK.

23  
24 \*corresponding author:

25  
26 Katie Druce

27  
28 [katie.druce@manchester.ac.uk](mailto:katie.druce@manchester.ac.uk); Arthritis Research UK Centre for Epidemiology, University of  
29 Manchester, Stopford Building, Oxford Road, Manchester, M13 9PT.  
30  
31  
32  
33  
34  
35  
36  
37  
38  
39  
40  
41  
42  
43  
44  
45  
46  
47  
48  
49  
50  
51  
52  
53  
54  
55  
56  
57  
58  
59  
60

## Abstract

Introduction: People with rheumatoid arthritis (RA) frequently report reduced health-related quality of life (HRQoL), the impact one's health has on physical, emotional and social well-being. There are likely numerous causes for poor HRQoL, but people with RA have identified sleep disturbances as a key contributor to their well-being. This study will identify the sleep and circadian rest-activity parameters that predict fluctuations in HRQoL in people with RA.

Methods and analysis: This prospective cohort study will recruit 350 people with RA, aged 18 years or older. Following completion of a paper-based baseline questionnaire, participants will record data on 10 symptoms including pain, fatigue, and mood twice-daily for 30 days using a study-specific mobile application (app). A tri-axial accelerometer will continuously record daytime activity and estimate evening sleep parameters over the 30 days. Every 10 days following study initiation participants will complete a questionnaire that measures disease specific (Arthritis Impact Measurement Scale 2 - Short Form (AIMS2-SF)) and generic (WHOQOL-BREF) quality of life. A final questionnaire will be completed at 60 days after entering the study. The primary outcomes are the AIMS2-SF and WHOQOL-BREF. Structural equation modelling (SEM) and latent trajectory models (LTM) will be used to determine the sleep and rest-activity parameters that predict fluctuations in HRQoL.

Ethics and dissemination: Ethical approval for this study has been obtained from the National Research Ethics Service (REC ref: 17/NW/0217). Results from this study will be disseminated at regional and international conferences, in peer-reviewed journals and Patient and Public Engagement (PPE) events, as appropriate.

### Strengths and limitations of this study

1. This study will take advantage of advances in mobile health (mhealth) to embed data collection into the daily lives of participants.
2. Using a patient co-designed smartphone/tablet app it will capture objective and subjective sleep as well as self-reported symptoms.
3. Sophisticated structural equation modelling (SEM) and latent trajectory models (LTM) will enable the study to disentangle the complex relationship between sleep, HRQoL and other symptoms.

## Introduction

Quality of life, sleep and rheumatoid arthritis (QUASAR) is a cohort study which will use a patient designed smartphone/tablet app and accelerometer to collect information on sleep and health-related quality of life (HRQoL) in rheumatoid arthritis (RA).

RA is a common chronic inflammatory disease characterised by joint damage, pain and disability<sup>1</sup>. Occurrence between two and four times greater in women a high proportion of people of working age with RA stop work due to the condition<sup>2;3</sup>. People with RA frequently report reduced HRQoL, which can be characterised as the impact one's health has on physical, emotional and social well-being. People with RA have poorer HRQoL when compared to those with other rheumatic diseases<sup>4</sup> or healthy peers<sup>5;6</sup>. Poor HRQoL may even persist when the disease is well controlled<sup>5</sup>.

Although there are likely numerous causes for poor HRQoL, but people with RA have identified sleep disturbances as a key contributor to their well-being<sup>7-9</sup>. It is well known that people with RA experience sleep disturbances<sup>10;11</sup>, with people often reporting less total sleeping time and unrefreshing sleep<sup>8</sup> and greater night time awakenings<sup>7;9</sup>. But sleep is a multifaceted behaviour<sup>12</sup> and it is not clear which, if any, aspects of sleep disturbance impact on HRQoL. Moreover, it has historically been difficult to measure sleep outside of artificial laboratory settings and to disentangle the relationship between sleep, HRQoL and other symptoms, because symptoms change day to day.

Advances in the availability of smartphone apps and wearables for health monitoring provide a hitherto unobtainable mechanism to collect regular self-reported symptoms and objective sleep data, while embedding data collection into participants' everyday lives. This study will use a combination of patient co-designed smartphone/tablet app (provided by uMotif, London, UK) and a tri-axial accelerometer (MotionWatch8, CamNtech, Cambridge, UK) to capture both subjective and objective assessments of sleep quality, continuity and duration, as well as the timing and stability of the periods of time when someone is asleep or active<sup>13</sup>. Furthermore, the uMotif app will be used to collect information about self-reported symptoms which were identified as priorities by patients in a series of focus groups and patient involvement activities. In doing so this study aims to identify which sleep and circadian rest-activity parameters predict reduced HRQoL in people with RA.

## Study objectives

- 1  
2  
3 1. Describe baseline and period distribution of sleep and circadian rest-activity parameters  
4 stratified by age, sex, socioeconomic status and disease characteristics. Determine  
5 relative contributions of sleep and circadian rest-activity parameters, pain, fatigue and  
6 mood to RA-HRQoL.  
7
- 8  
9 2. In an exploratory analysis examine whether the relationship between disease severity,  
10 sleep and circadian rest-activity parameters, pain, fatigue and mood and RA-HRQoL are  
11 moderated by age and sex.  
12
- 13  
14 3. Estimate the potential effect on RA-HRQoL of a successful intervention targeted at the  
15 key identified pathway(s).  
16  
17  
18  
19

## 20 Experimental design and methods

### 21 22 23 24 **Methods and analysis:**

#### 25 26 27 Study design

28  
29 We will conduct a prospective cohort study to investigate the relationships between sleep and  
30 HRQoL in people with RA.  
31  
32

#### 33 34 *Identifying and recruiting potential participants*

35  
36 Participants will be recruited via three channels. The primary source for participants will be the  
37 National Rheumatoid Arthritis Society (NRAS). NRAS is a national patient organisation with over 7000  
38 members. Emails advertising the study will be sent to NRAS mailing list members and will include a  
39 copy of the study information pack comprising:  
40  
41  
42

- 43  
44 1. Study poster
- 45 2. Participant information sheet
- 46 3. Copy of the consent form (for information only)
- 47 4. A link to complete an online screening questionnaire  
48  
49

50  
51 Following approval from the Health Research Authority (HRA) and via arrangements with Clinical  
52 Commissioning Groups (CCGs), participants will also be recruited via NHS mailing lists, where such  
53 mailing lists are available. NHS mailing lists provide the opportunity to search General Practitioner  
54 (GP) records for potentially eligible participants. Local Clinical Research Network (CRN) teams will  
55  
56  
57

1  
2  
3 search GP records for patients aged 18 or older, with a diagnosis of RA and who are in receipt of a  
4 Disease Modifying Anti-rheumatic Drug (DMARD), as recommended by Muller et al<sup>14</sup>. Letters will be  
5 sent to the identified patients, provided the GP or clinical team in the practice confirms that  
6 approaching the patient is acceptable. Reasons for not approaching patients may include previous  
7 refusal for records to be used for research, current hospitalisation, or belief that the participant is  
8 not capable of participation. Within the letter, participants will be briefly introduced to the study  
9 and persons interested in participating will be asked to email the study team directly for the study  
10 information pack, the contents of which are detailed above.  
11  
12  
13  
14  
15

16  
17 Information about the study will be displayed on the NIHR Clinical Research Network Portfolio to  
18 encourage NHS sites to support study recruitment by displaying posters advertising the study in any  
19 NHS Rheumatology clinics. NHS sites interested in supporting the study will contact the study team  
20 directly for further information and all relevant documentation needed to confirm they have the  
21 capacity and capability required to support the study. The displayed posters will provide brief  
22 information about the study and will ask persons interested in participating to email the study team  
23 directly for the study information pack, the contents of which are detailed above.  
24  
25  
26  
27  
28

29  
30 Following the receipt of the study information pack, potential participants follow an identical  
31 recruitment strategy (Figure 1).  
32  
33

34 [Figure 1 here]

35  
36 *Figure 1 – Flow of participant entry into the study*  
37  
38  
39

#### 40 **Screening questionnaire**

41 Persons who receive the study information pack and are interested in participating in the study are  
42 asked to complete the study screening questionnaire. Potential participants are asked to record their  
43 sex and date of birth, and to confirm whether they a) have a diagnosis of RA (including date of  
44 diagnosis), b) are currently using DMARDs (biologic or conventional synthetic), c) have access to an  
45 Android or Apple smartphone or tablet. For the purposes of exclusion criteria interested persons  
46 must also indicate whether they are currently employed in shift work. Finally, potential participants  
47 are asked to give consent and contact details and preferred contact time (9am and 12 noon, 12 noon  
48 and 3pm, 3pm and 6pm or 6pm and 8pm) to enable the study team to contact them to discuss  
49 participation in the study.  
50  
51  
52  
53  
54  
55  
56  
57  
58  
59  
60

### ***Eligibility criteria***

Screening questionnaire respondents will be considered eligible for the study if they:

- Are aged  $\geq 18$  years
- Have a diagnosis of rheumatoid arthritis
- Are currently using DMARDs (biologic or conventional synthetic)
- Have access to an Android or Apple smartphone or tablet

Respondents would be excluded from the study if they:

- Are currently employed in a job that requires shift work

### ***QUASARid***

Study participants will be asked to provide data via a three different platforms: paper-based questionnaires, a study app (downloaded onto a smartphone or tablet), and a tri-axial accelerometer that will measure daytime physical activity and sleep. To ensure that the data collected across these platforms can be consistently and accurately linked and matched to each participant, a unique participant identifier will be generated for each participant. The unique identifier, known as a QUASARid, will be automatically generated as the unique survey response which is allocated to the participant when they commence the screening questionnaire.

### ***Telephone call***

Potential participants meeting the study inclusion criteria will be telephoned by a member of the study team. To ensure they have had adequate time to review the participant information sheet provided in the study information email, telephone calls will take place no earlier than 24 hours after receipt of a completed screening questionnaire. A total of four attempts to contact the potential participant will be made on consecutive week days. During the phone call a verbal summary of the information sheet will be discussed with the potential participant and they will be given the opportunity to ask as many questions about the study as they wish.

### ***Verbal consent and agreement of study start date***

Following the verbal summary of the study information sheet, participants will be given the option to enrol into the study, delay participation, request more time to think about participation or decline to take part in the study. Written consent is subsequently obtained by the completion of two paper copies of the consent form sent to participants within the study pack. The provided consent forms will be signed and dated by the team member responsible for recruitment at the point of obtaining



1  
2  
3 verbal consent, with participants asked to complete their own signature at the time of completing  
4 the baseline questionnaire. One copy of the consent form is to be returned by the participant at the  
5 end of their first 30 days in QUASAR, along with the actigraph watch and baseline questionnaire. The  
6 second copy is for the patients' personal records.  
7  
8  
9

10  
11 Once verbal consent has been obtained participants will be asked to agree a study start date, which  
12 should be within 14 days of the telephone call taking place. Participants who are unable to  
13 commence the study within 14 days will be asked to delay entry into the study. Those who agree a  
14 study start date will be asked to confirm their preferred postal address to which the study packs will  
15 be sent and a mobile phone number. The mobile phone number will be used to send participants  
16 text messages on the agreed study start date and throughout the study to encourage data  
17 completion and study compliance.  
18  
19  
20  
21  
22

### 23 ***Study pack***

24  
25 The provision of verbal consent also enables the study pack to be prepared and posted to  
26 participants in advance of the agreed study start date. The study pack will include a letter of  
27 introduction, two copies of the consent form and a paper copy of the baseline questionnaire.  
28 Participants will also be provided with instructions to download and use the study app, as well as an  
29 actigraph watch, called a MotionWatch8 (CamNtech, Cambridge, UK) and associated instructions.  
30 The study pack will be sent from the University of Manchester using Special Delivery Guaranteed® to  
31 arrive no less than one day prior to the study start date.  
32  
33  
34  
35  
36  
37

### 38 ***Document completion – Consent form and baseline questionnaire***

39  
40 Participants are requested to complete paper copies of the consent form and baseline questionnaire  
41 (sent within the study pack) on, or before the first day of symptom monitoring. Initially the baseline  
42 questionnaire was incorporated into the study app to be completed as part of the on-boarding  
43 process. However, due to limits on the number of questions which could be displayed per screen  
44 and the associated time required for data completion, app testing with the study team and members  
45 of a focus group indicated that this method of delivery would be less acceptable to participants than  
46 a paper based document.  
47  
48  
49  
50

51  
52 The participant's QUASARid will be written onto both the consent form and covering page of the  
53 baseline questionnaire to enable data linkage between these documents, the study app and  
54 actigraph watch. To encourage completion of the questionnaire is completed in advance of the  
55  
56  
57  
58  
59  
60

1  
2  
3 monitoring period, participants are asked to indicate the date on which they have completed the  
4 questionnaire on the covering page. They will return the baseline questionnaire along with the  
5 monitor at the end of the study.  
6  
7

8 The baseline questionnaire will comprise three sections: Demographic information, information  
9 about RA and health status information. The items we will collect are shown in Table 1  
10  
11  
12  
13  
14  
15  
16  
17  
18  
19  
20  
21  
22  
23  
24  
25  
26  
27  
28  
29  
30  
31  
32  
33  
34  
35  
36  
37  
38  
39  
40  
41  
42  
43  
44  
45  
46  
47  
48  
49  
50  
51  
52  
53  
54  
55  
56  
57  
58  
59  
60

For peer review only

| Table 1 – Baseline questionnaire domains and scales            |                                                                                                                                                                                                                                                                                                                                                           |
|----------------------------------------------------------------|-----------------------------------------------------------------------------------------------------------------------------------------------------------------------------------------------------------------------------------------------------------------------------------------------------------------------------------------------------------|
| Domain                                                         | Scales/measurement                                                                                                                                                                                                                                                                                                                                        |
| Demographics                                                   |                                                                                                                                                                                                                                                                                                                                                           |
| Sex                                                            | Tick box – male or female                                                                                                                                                                                                                                                                                                                                 |
| Date of birth                                                  | Day, month, year                                                                                                                                                                                                                                                                                                                                          |
| Height and Weight                                              | Free text (metric or imperial)                                                                                                                                                                                                                                                                                                                            |
| Ethnicity                                                      | Free text                                                                                                                                                                                                                                                                                                                                                 |
| Age left education                                             | Free text                                                                                                                                                                                                                                                                                                                                                 |
| Smoking status                                                 | Tick box – current, ex-, or never smoker                                                                                                                                                                                                                                                                                                                  |
| Occupational status                                            | Tick box – working full time, working part time, student, medically retired, voluntary worker, unemployed but seeking work or retired                                                                                                                                                                                                                     |
| Marital status                                                 | Tick box – Single, in a relationship, co-habiting, married, civil partnership, separated, divorced or widowed                                                                                                                                                                                                                                             |
| Alcohol consumption                                            | Tick box –average units per week: 0, 1-5, 6-10, 11-15, 16-20, 21-40, >40                                                                                                                                                                                                                                                                                  |
| Impact of RA on work                                           | Work productivity question from Work Productivity and Activity Impairment – specific health problem (WPAI-SHP)                                                                                                                                                                                                                                            |
| Postcode                                                       | Free text for first half of postcode                                                                                                                                                                                                                                                                                                                      |
| Belief that sleep affects HRQoL                                | 0-10 NRS: 0 “Not at all likely”, 10 “Very likely”                                                                                                                                                                                                                                                                                                         |
| Information about RA                                           |                                                                                                                                                                                                                                                                                                                                                           |
| Date of RA diagnosis                                           | Month and year                                                                                                                                                                                                                                                                                                                                            |
| Disease activity                                               | Routine Assessment of Patient Index Data 3 (RAPID-3)                                                                                                                                                                                                                                                                                                      |
| Co-morbid rheumatic disease(s) and sleep-related problem(s)    | Check list – osteoarthritis, spondyloarthritis/ankylosing spondylitis, fibromyalgia/chronic widespread pain, gout or other crystal arthritis, Sjogren’s syndrome, restless leg syndrome, obstructive sleep apnea/snoring, thyroid disorder, diabetes, multiple sclerosis, hypertension.                                                                   |
| Menopausal status                                              | Tick box – yes/no                                                                                                                                                                                                                                                                                                                                         |
| Current medication(s) and non-pharmacological intervention use | Check list – paracetamol, non-steroidal anti-inflammatory drugs (NSAIDs), other analgesics, weak opiates, strong opiates, drugs for neuropathic pain, glucocorticoids, synthetic disease modifying anti-rheumatic drugs (DMARDs), biologic DMARDs, sedatives (or hypnotics), mood stabilisers, antidepressants, other sleep medications.<br>Free-text box |
| Health status information                                      |                                                                                                                                                                                                                                                                                                                                                           |
| Disease specific quality of life                               | Arthritis Impact Measurement Scale 2 - Short Form (AIMS2-SF)                                                                                                                                                                                                                                                                                              |
| Generic Quality of life                                        | WHOQOL-BREF                                                                                                                                                                                                                                                                                                                                               |
| Prioritisation domains for good HRQoL                          | Participants are asked to use a free text box to indicate top 3 things which are most important to them to ensure they have good quality of life.                                                                                                                                                                                                         |
| Sleep quality                                                  | Pittsburgh Sleep Quality Index (PSQI)                                                                                                                                                                                                                                                                                                                     |
| Beliefs about sleep                                            | Dysfunctional Beliefs and Attitudes about Sleep questionnaire (DBAS-16)                                                                                                                                                                                                                                                                                   |
| Insomnia                                                       | Sleep Condition Indicator (SCI)                                                                                                                                                                                                                                                                                                                           |

|                       |                                               |
|-----------------------|-----------------------------------------------|
| Mood                  | Hospital Anxiety and Depression Scale (HADS)  |
| Self-efficacy         | Arthritis Self-Efficacy Scale-8 item (ASES-8) |
| Cognitive flexibility | Committed Action Questionnaire (CAQ-8)        |

### ***Study commences (Day 1)***

On the agreed study start date, participants will receive a text message on the mobile phone number the provided during the recruitment process. The reminder text message will ask participants to put on their activity monitor and to download the study app and register for an account. It will also include a study password, which will unlock the app to allow the participant to commence full registration, and a reminder of their QUASARid, which must be entered during the registration process to enable data linkage between the study app, actigraph watch and paper questionnaires.

### ***App installation and account set up***

Instructions about how to download the study app, which can be installed onto the participants' Apple or Android smartphone, tablet or both, will be included within the study pack that will be posted to participants. Once the app is installed participants will be asked to:

- complete a standard registration form (including creation of a username and password)
- enter their unique QUASARid, sex and date of birth, to enable linkage between the study's different data collection platforms

Registrations will be monitored via a live database, held by uMotif, of the data collected by the study app, to which the study team is provided secure access. All data provided by participants using the study app are immediately transferred to uMotif server and visible in the database in real-time via 3G/4G/ Wifi. Any participants who have not registered with the app on their agreed start date, or within a 5 day window of that date, will be contacted by the study team to understand what issues may have arisen. If appropriate, participation in the study may be rescheduled for a later date.

### ***Data collection***

1  
2  
3 Following app-installation and the completion of the baseline questionnaire, participants will  
4 commence data collection lasting a total of 60 days. The first 30 days of the study comprise the  
5 continuous data collection phase of the study during which time participants wear the actigraph  
6 watch 24 hours a day and complete a once-daily sleep diary and twice daily symptom reports. During  
7 this 30 day monitoring period participants will also complete follow-up questionnaires on days 10,  
8 20 and 30 of the study. No data are recorded between days 31 and 59, but participants are asked to  
9 complete a final follow-up questionnaire on day 60 of the study.  
10  
11  
12  
13  
14  
15  
16

17 During focus groups conducted to inform the design of this study, participants discussed a desire to  
18 have options for on-going support from the study team via telephone contact. For that reason we  
19 will send personalised messages on days 5, 15 and 25 to encourage participation and give the  
20 participant the option to email or telephone the study team if they would like to discuss any issues  
21 or concerns. Any emails or requests for telephone calls will be responses to by the study's post-  
22 doctoral research associate, or principal investigator, at the earliest possible opportunity, and no  
23 later than one working day after the response is received.  
24  
25  
26  
27  
28

29 A full outline of the data collected is provided below.  
30  
31  
32  
33

#### 34 ***Day 1-30 – Actigraph watch and uMotif app***

35  
36 Continuous monitoring of sleep and physical activity.  
37  
38

39 Participants will wear the MotionWatch 8 (MW8; CamNtech, Cambridge, UK) for 24 hours a day over  
40 the 30 days of continuous data collection. The MW8 is a Class I Medical device which conforms to  
41 the essential safety and health requirements and provisions of EC Council Directives 93/42.EEC,  
42 Annex VII. The MW8 requires a standard watch battery (CR2032) which is replaced each time the  
43 watch is used. The configuration of the MW8 for the present study will enable the watch to collect  
44 data for up to 45 days, providing an additional two week window for data to be collected in  
45 instances where study entry may have been delayed.  
46  
47  
48  
49  
50

51 The MW8 monitors limb or bodily movements during daily living and sleep at 30 second time points  
52 (epochs) using a tri-axial accelerometer. It is waterproof for up to 1 hour at 1 meter and is therefore  
53 suitable for use while swimming or showering. As the data are stored on the watch and downloaded  
54 via a USB connection by members of the study team after data collection has been completed and  
55  
56  
57  
58  
59  
60

1  
2  
3 the watches have been returned. There is therefore no real-time data transmission and it will not be  
4 possible to assess participant compliance until the actigraph watch is returned.  
5  
6  
7

#### 8 9 Daily symptom reporting

10  
11 During the 30 day continuous data collection, participants will be asked to use the uMotif study app  
12 to report their experience of daily symptoms. Within the app, the unique 'motif' interface is used by  
13 patients to simply track their daily symptoms. The motif which comprises 10 symptom segments,  
14 such as pain severity as highlighted in Figure 2. The uMotif study app has been used in multiple  
15 ethics-approved studies, capturing over 64 million data points from patients using their own  
16 devices. The uMotif app has been specifically configured to capture the data required for the  
17 QUASAR study.  
18  
19  
20  
21  
22  
23  
24  
25

26 [Figure 2 here]

#### 27 28 *Figure 2 - Screenshot of uMotif study app*

29  
30 Participants will receive prompts twice daily to complete the symptom ratings, once in the morning  
31 and once in the afternoon/evening. Symptom data are scored on an ordinal scale of 1-5 and are  
32 recorded by touching and sliding the relevant segment within the motif. The symptoms to be  
33 recorded (Table 2) were defined and agreed with consultation of participants in focus groups<sup>15</sup>.  
34  
35  
36

37 Throughout the study participants will receive reminders via the study app to complete the  
38 symptom assessments at 8am and 6pm. Participants are able to provide additional symptom reports  
39 throughout the day at their discretion.  
40  
41  
42  
43  
44  
45  
46  
47  
48  
49  
50  
51  
52  
53  
54  
55  
56  
57  
58  
59  
60

| Symptom         | Question                                                  | Anchor 1 (centre of motif) | Anchor 5 (outside of motif) |
|-----------------|-----------------------------------------------------------|----------------------------|-----------------------------|
| Pain            | How severe is your pain?                                  | No Pain                    | Very Severe Pain            |
| Fatigue         | How severe is your fatigue?                               | No Fatigue                 | Very Severe Fatigue         |
| Mood            | How is your mood?                                         | Depressed                  | Very Happy                  |
| Well-being      | How well do you feel?                                     | Very Well                  | Very Unwell                 |
| Anxiety         | How anxious do you feel?                                  | Very Well                  | Very Anxious                |
| Illness impact  | How much is your illness impacting on your activities?    | No Impact                  | Very Severe Impact          |
| Disease control | How much control do you feel you have over your symptoms? | No Control                 | Very Good Control           |
| Challenge       | How challenging are you finding today?                    | Not Challenging            | Severely Challenging        |
| Sleepiness      | How sleepy do you feel?                                   | Not Sleepy                 | Very Sleepy                 |
| Concentration   | How would you rate your concentration?                    | Poor                       | Excellent                   |

The completion of these symptom data can be continually monitored via a live database, held by uMotif, of the data collected by the study app, to which the study team is provided secure access. As all data provided by participants using the study app are immediately transferred to uMotif server in real-time via 3G/4G/ Wifi, it will be possible for the study team to produce daily reports to monitor whether participants are completing their data in line with the study protocol.

A window of two consecutive days during the 30 day continuous monitoring period will be considered an acceptable period of non-completion for the daily symptom reports, sleep diaries and follow-up questionnaires. After this point, participants will receive a single reminder text message to encourage them to recommence data entry or contact the study team to discuss any concerns or issues, as appropriate.

### ***Day 2-31 – Consensus Sleep Diary***

The reminder sent to participants at 8am will also ask them to complete the 9 item Consensus Sleep Diary (CSD). This diary, which is completed in a separate section of the study app ([figure 3 here]

*Figure 3*), pertains to the previous night's sleep. To ensure coverage of all 30 nights of actigraphy data collection, it will be completed on the morning of days 2-31. Participants will be prompted via

1  
2  
3 the app to complete the CSD every morning at 8am, though they will be able to complete it earlier if  
4 they wish.  
5  
6  
7

8  
9 [figure 3 here]

10  
11 *Figure 3 – Screenshot of consensus sleep diary within study app*  
12  
13

14  
15 An additional 4 items will ask participants to report the duration of morning stiffness (in minutes),  
16 emotional strength, motivation and worry about sleeping the previous evening.  
17  
18

19 As with the symptom reports, it will be possible to continually monitor sleep diary completion using  
20 the live database, held by uMotif. The study team will therefore produce daily reports to monitor  
21 whether participants are completing their sleep diaries in line with the study protocol. Any  
22 participant who does not complete their sleep diary for more than two days will receive a single  
23 reminder text message to encourage them to recommence data entry or contact the study team to  
24 discuss any concerns or issues, as appropriate. It will not be possible to retrospectively complete the  
25 sleep diaries for missing days.  
26  
27  
28  
29  
30  
31  
32

### 33 ***Day 10, 20 and 30 – HRQoL, disease activity and life events***

34  
35 A number of follow-up questionnaires will be used throughout the study. Prompts to complete the  
36 questionnaires will be sent. Requests to complete the follow-up questionnaires will be delivered to  
37 participants, via the app to participants, on the day they are to be completed when they open the  
38 study app. These reminders are automatically generated and sent from uMotif and cannot be  
39 personalised. The questionnaires completed at days 10, 20 and 30 will capture the below items:  
40  
41  
42  
43

- 44
- 45 • Disease specific quality of life – AIMS2-SF
- 46 • Generic quality of life – WHOQOL-BREF
- 47 • Disease activity - RAPID-3
- 48 • Occurrence of important events
- 49
- 50

51  
52 As with all data collected via the study app, the data recorded in each follow-up questionnaire will  
53 be immediately transferred to uMotif server in real-time via 3G/4G/ Wifi. Completion of follow-up  
54 questionnaires will be monitored within daily reports produced by the study team and any  
55  
56  
57



1  
2  
3 participant who has not completed their questionnaire within two days of the required date will  
4 receive a single reminder text message to request that they complete the questionnaire as soon as  
5 possible. Participants will be given instructions to manually access and complete the follow-up  
6 questionnaire forms or contact the study team to discuss any concerns or issues, as appropriate.  
7  
8  
9

10 Following the 30 days of data collection, participants will receive a text message to remind them to  
11 stop wearing the activity monitor and to send it back to the study team at the earliest convenient  
12 time, using the provided return addressed envelope. The envelopes, to which the relevant postage  
13 will be attached to return the package using Royal Mail Signed For® 1<sup>st</sup> Class must be returned via  
14 the local postage to obtain proof of postage; participants will not be required to pay any additional  
15 postage to obtain this. In instances where the watch does not appear to have been dropped off at  
16 the Post Office within 5 days of the expected end date, the study team will contact the participant.  
17  
18  
19  
20  
21

22 Participants are not expected to continue tracking their symptoms or using the study app for  
23 continuous monitoring after day 30 and at this point participants may wish to uninstall the study  
24 app. For that reason, as the completion of the study's final questionnaire will occur 30 days after the  
25 continuous data collection phase has ended (day 60), participants may no longer be using the app  
26 and may have uninstalled it from their devices. Within the text message sent on day 30 of the study  
27 to congratulate participants on completing the continuous monitoring phase, participants are asked  
28 to advise the study team if they would like to receive a paper copy of the final follow-up  
29 questionnaire.  
30  
31  
32  
33  
34  
35  
36  
37

### 38 ***Day 60 – Final follow-up questionnaire***

39  
40  
41 The study's final follow-up questionnaire will be completed at day 60. It is assumed that those who  
42 do not request a paper copy are happy to complete the questionnaire using the app. Participants will  
43 be prompted to complete the questionnaire by reminders are automatically generated and sent  
44 from uMotif. As before these reminders are generic and cannot be personalised.  
45  
46  
47

48 The questionnaire will capture:

- 49
- 50 • Disease specific quality of life – AIMS2-SF
- 51 • Generic quality of life – WHOQOL-BREF
- 52 • Prioritisation of domains - participants asked to use a free text box to indicate top 3 things  
53 which are most important to them to ensure they have good quality of life.  
54  
55  
56  
57

- Disease activity - RAPID-3
- Current medication(s) and non-pharmacological intervention use
- Sleep quality – PSQI
- Occurrence of important events

|                                                                | Pre-registration | Day ≤1 (paper) | Day 10 (app) | Day 20 (app) | Day 30 (app) | Day 60 (app/paper) |
|----------------------------------------------------------------|------------------|----------------|--------------|--------------|--------------|--------------------|
| Screening questionnaire                                        | X                |                |              |              |              |                    |
| Demographics                                                   |                  | X              |              |              |              |                    |
| Information about RA                                           |                  | X              |              |              |              |                    |
| RAPID- 3                                                       |                  | X              | X            | X            | X            | X                  |
| Current medication(s) and non-pharmacological intervention use |                  | X              |              |              |              | X                  |
| RAQoL                                                          |                  | X              | X            | X            | X            | X                  |
| WHOQOL-BREF                                                    |                  | X              | X            | X            | X            | X                  |
| PSQI                                                           |                  | X              |              |              |              | X                  |
| DBAS-16                                                        |                  | X              |              |              |              |                    |
| SCI                                                            |                  | X              |              |              |              |                    |
| HADS                                                           |                  | X              |              |              |              |                    |
| ASES-8                                                         |                  | X              |              |              |              |                    |
| CAQ-8                                                          |                  | X              |              |              |              |                    |

A complete overview of data collection and participant contact is shown in Figure 4.

[Figure 4 here]

*Figure 4 - Data collection and participant contact across 60 days for participants enrolled in QUASAR*

#### *Sample size*

A sample size calculation has been conducted to determine a minimum sample size required to enable the study to conduct structural equation modelling (SEM). A conservative minimum effect size of 0.2 (rated as small), with 60 daily measurements, 13 observed variables and a significance level of 5% and power of 80%, determined a minimum sample size of 166 participants.

1  
2  
3 In this study 50 actigraph watches will be obtained. This means that the maximum capacity for  
4 concurrent data collection is 50 and that data collection will be conducted in waves. Previous studies  
5 have estimated that of all persons who receive the study information pack, 5% will enrol into the  
6 study and provide complete useable data. For that reason, a total of 3500 information packs will be  
7 sent to participants, to obtain a total sample of 175 participants with full data, in excess of the  
8 minimum 166 persons required for the analysis.  
9  
10  
11

### 12 *Recruitment*

13  
14  
15 In order to manage the flow of participants into the study, given the limited number of actigraph  
16 watches available, NRAS have agreed to contact mailing list members in in 7 regionally-stratified  
17 recruitment waves in order that actigraph watches can be returned by earlier participants, prepared  
18 and sent out to future participants. The dates of each wave are listed below:  
19  
20  
21  
22

23 Wave 1 – 8 May 2017

24 Wave 2 – 17 July 2017

25 Wave 3 – 25 September 2017

26 Wave 4 – 4 December 2017

27 Wave 5 – 12 February 2018

28 Wave 6 – 23 April 2018

29 Wave 7 – 2 July 2018  
30  
31  
32  
33  
34  
35

36 The identification of GP practices and NHS Rheumatology clinics able to support recruitment to the  
37 QUASAR study will occur throughout the study. Once identified, the letters sent to potential  
38 participants identified via the screening of GP records will be sent to coincide with the above mailing  
39 waves used by NRAS. Participants who see information about the study in NHS Rheumatology clinics  
40 will be free to contact the study team at any point, however their enrolment into the study will be  
41 restricted to coincide with the above mailing waves.  
42  
43  
44  
45

### 46 *Targeted recruitment*

47  
48  
49 The study's third objective is to examine whether the relationships between sleep and HRQoL are  
50 moderated by age and sex. It is therefore important to ensure that a representative sample of  
51 people with RA are enrolled into the study. Table 4 displays the estimated UK prevalence of RA and  
52 demonstrates that women are around three times more likely to be affected than men, and the  
53 increased prevalence of RA in older populations<sup>2</sup>.  
54  
55  
56  
57  
58  
59  
60

1  
2  
3  
4  
5  
6  
7  
8  
9  
10  
11  
12  
13  
14  
15  
16  
17

| Age                    | Males (%) | UK estimate | Females (%) | UK estimate |
|------------------------|-----------|-------------|-------------|-------------|
| 16–44                  | 0.02      | 2,500       | 0.12        | 15,100      |
| 45–64                  | 0.58      | 42,900      | 1.67        | 126,900     |
| 64–74                  | 1.14      | 27,100      | 2.56        | 67,800      |
| 75+                    | 2.18      | 39,100      | 2.99        | 85,700      |
| Total adult population | 0.44      | 106,500     | 1.16        | 297,600     |

18 From previous studies, we know that young men and older people of both sexes are often under-  
19 represented populations. They may be less likely to express an interest in taking part in studies, or  
20 they may be excluded by the inclusion/exclusion criteria used. In anticipation that some of these  
21 ‘hard to reach’ groups may be under-represented in our sample, we propose to monitor the  
22 characteristics of participants who are enrolled in the study and apply stratified recruitment  
23 processes in later recruitment waves if required.  
24  
25  
26  
27

#### 28 Data analysis plan

29  
30  
31 Analyses techniques used in descriptive epidemiology will address aim 1. Data will be presented as  
32 absolute numbers and percentages, presented for the whole group, and stratified by age, sex and  
33 level of socioeconomic deprivation.  
34  
35

36 Using structural equation modelling (SEM) and latent trajectory models (LTM) we will address the  
37 studies second aim: to examine if disrupted sleep patterns are associated with poor HRQoL.  
38  
39

40 SEM will assess whether the sleep and circadian rest-activity parameters measured at baseline  
41 mediate the association between RAPID3 score and HRQoL at 60 days (the end of the follow-up  
42 period) allowing inter-correlation between the sleep and circadian rest-activity parameters and  
43 adjusting for putative confounders. The SEM analysis will be repeated adding to the model pain,  
44 fatigue and mood to assess the effect of on HRQoL (for example Figure 5). Finally the analysis will be  
45 repeated including the data on mediators collected at day 30. This will allow assessment of whether  
46 RAPID3 predicts change in the mediating factors and the subsequent impact on HRQoL at day 60. An  
47 exploratory multi-group SEM analysis will assess the moderating effects of age and sex and will thus  
48 address the third aim of this study.  
49  
50  
51  
52  
53  
54

55 [Figure 5 here]

1  
2  
3 *Figure 5 – Hypothetical model of the pathways of relationship between rheumatoid arthritis and*  
4 *quality of life disease severity, sleep, fatigue, mood, and pain– simple model. In this figure rectangles*  
5 *represent observed variables, and circles represent the constructs those variables represent. Solid*  
6 *arrows represent the pathways to be tested. RAPID-3: Routine Assessment of Patient Index Data 3,*  
7 *CSD: Consensus Sleep Diary, PSQI: Pittsburgh Sleep Quality Index, AIMS2-SF: Arthritis Impact*  
8 *Measurement Scale 2 - Short Form.*  
9

10  
11  
12  
13 The SEM analysis assumes that the identified associations are consistent across participants, and  
14 uses only selected time points. Latent trajectory models will utilise all of the repeated measures data  
15 to fully explore the longitudinal relationships between RAPID3, mediators, and HRQoL, and their  
16 variation between participants. First, multilevel growth models, accounting for the clustering of  
17 repeated measures (level 1) within participants (level2), will assess the prospective associations of  
18 RAPID3 with key observed pathways from the SEM analysis, and the prospective associations with  
19 HRQoL. Second, we will assess if distinct clusters of participants can be identified with different  
20 longitudinal courses using dual trajectory latent class growth analysis. We will assess how these  
21 trajectories are associated with change in HRQoL over 60 days and the socio-demographic and  
22 clinical characteristics associated with these different trajectories.  
23  
24  
25  
26  
27  
28

29 Finally, to estimate how successful treatments that improve sleep might be for people with RA, we  
30 will use the information obtained from the above methods to estimate the potential effect on  
31 HRQoL of a hypothetical successful intervention targeted at the key identified sleep disturbances,  
32 taking into account the proportion of variance in HRQoL explained and how common the sleep  
33 disturbance is in the population.  
34  
35  
36  
37

### 38 **Ethics and dissemination:**

39  
40  
41 This study was underwent a full NHS Research Ethics Committee (REC) review and was allocated to  
42 the National Research Ethics Service (NRES) Committee North West – Liverpool Central REC. The  
43 study was approved by the NRES Committee North West – Liverpool Central REC on 12 April 2017,  
44 reference 17/NW/0217.  
45  
46  
47

48 Results from this study will be disseminated at regional and international conferences and in peer-  
49 reviewed journals. Results will also be disseminated at Patient and Public Engagement (PPE) events  
50 where opportunities arise and are appropriate.  
51  
52  
53  
54  
55  
56  
57

## Reference List

1. NICE. Rheumatoid Arthritis: National Clinical Guideline for Management and Treatment in Adults. Clinical guideline [CG79]. 2015. National Institute of Health and Clinical Excellence.
2. Symmons D, Turner G, Webb R, Asten P, Barrett E, Lunt M *et al*. The prevalence of rheumatoid arthritis in the United Kingdom: new estimates for a new century. *Rheumatology* 2002;**41**:793-800.
3. Verstappen SMM, Bijlsma JWJ, Verkleij H, Buskens E, Blaauw AAM, Ter Borg EJ *et al*. Overview of work disability in rheumatoid arthritis patients as observed in cross-sectional and longitudinal surveys. *Arthritis Care & Research* 2004;**51**:488-97.
4. Dominik K, Ahern F, Gold C, Heller D. Health-related quality of life among older adults with arthritis. *Health and quality of life outcomes* 2004;**2**:1-8.
5. Gerhold K, Richter A, Schneider M, Bergerhausen H, Demary W, Liebhaber A *et al*. Health-related quality of life in patients with long-standing rheumatoid arthritis in the era of biologics: data from the German biologics register RABBIT. *Rheumatology* 2015;**54**:1858-66.
6. Geryk L, Carpenter D, Blalock S, DeVillis R, Jordan J. The impact of co-morbidity on health-related quality of life in rheumatoid arthritis and osteoarthritis patients. *Clinical and experimental rheumatology* 2015;**33**:366-74.
7. Drewes AM, Svendesn L, Taagholt SJ, Bjerregard K, Nielsen KD, Hansen B. Sleep in rheumatoid arthritis: a comparison with healthy subjects and studies of sleep/wake interactions. *British Journal of Rheumatology* 1998;**37**:71-81.
8. Roehrs T, Diederichs C, Gillis M, Burger A, Stout R, Lumley M *et al*. Nocturnal sleep, daytime sleepiness and fatigue in fibromyalgia patients compared to rheumatoid arthritis patients and healthy controls: a preliminary study. *Sleep Medicine* 2013;**14**:109-15.
9. Crosby LJ. Factors which contribute to fatigue associated with rheumatoid arthritis. *Journal of advanced nursing* 1991;**16**:974-81.
10. Wolfe F, Walitt BT, Katz RS, Hauser W. Symptoms, the nature of fibromyalgia, and diagnostic and statistical manual 5 (DSM-5) defined mental illness in patients with rheumatoid arthritis and fibromyalgia. *PLoS One* 2014;**14**:e88740.
11. Lee YC, Chibnik LB, Lu B, Wasan AD, Edwards RR, Fossel AH *et al*. The relationship between disease activity, sleep, psychiatric distress and pain sensitivity in rheumatoid arthritis: a cross-sectional study. *Arthritis research & therapy* 2009;**11**:1-11.
12. Tafti M. Genetic aspects of normal and disturbed sleep. *Sleep Medicine* 2009;**10**:S17-S21.
13. Buysse DJ. Sleep health: can we define it? Does it matter? *Sleep* 2014;**37**:9-17.

- 1
- 2
- 3 14. Muller S, Hider SL, Raza K, Stack RJ, Hayward RA, Mallen CD. An algorithm to identify
- 4 rheumatoid arthritis in primary care: a Clinical Practice Research Datalink study. *BMJ open*
- 5 2015;**5**:e009309.
- 6
- 7 15. Short V, McBeth J, Druce KL, Moore S, Dixon WG, Kyle SD *et al*. Fluctuating, unpredictable and
- 8 challenging: how pain, fatigue and sleep disturbance impact on quality of life in people with
- 9 rheumatoid arthritis. *Annals of the rheumatic diseases* 2017;**76**.
- 10
- 11
- 12
- 13
- 14
- 15
- 16
- 17
- 18
- 19
- 20
- 21
- 22
- 23
- 24
- 25
- 26
- 27
- 28
- 29
- 30
- 31
- 32
- 33
- 34
- 35
- 36
- 37
- 38
- 39
- 40
- 41
- 42
- 43
- 44
- 45
- 46
- 47
- 48
- 49
- 50
- 51
- 52
- 53
- 54
- 55
- 56
- 57
- 58
- 59
- 60

For peer review only

1  
2  
3 Authors contributions:

4 JM led the conception and design of the study.

5 KLD, LC, VS, SM, BH, ML, DSK, WGD and JM made substantial contributions to the conception and  
6 design of the study.

7 JM and ML planned the statistical analysis.

8 KLD wrote the first draft of the protocol manuscript.

9 LC, VS, SM, BH, ML, DSK, WGD and JM critically reviewed the protocol manuscript.

10 KLD, LC, VS, SM, BH, ML, DSK, WGD and JM approved the final version of the document.  
11  
12

13  
14 Data sharing statement: We intend to make data available for data sharing after the data collection  
15 has been completed and the primary aims of the study are met.  
16

17  
18 Funding statement: This study is supported by Arthritis Research UK grant number 21188. The study  
19 is also supported by infrastructure support from the Arthritis Research UK Centre for Epidemiology  
20 (grant reference 20380).  
21  
22

23  
24 Competing interests statement: The authors have no competing interests to disclose  
25  
26  
27  
28  
29  
30  
31  
32  
33  
34  
35  
36  
37  
38  
39  
40  
41  
42  
43  
44  
45  
46  
47  
48  
49  
50  
51  
52  
53  
54  
55  
56  
57  
58  
59  
60



1  
2  
3  
4  
5  
6  
7  
8  
9  
10  
11  
12  
13  
14  
15  
16  
17  
18  
19  
20  
21  
22  
23  
24  
25  
26  
27  
28  
29  
30  
31  
32  
33  
34  
35  
36  
37  
38  
39  
40  
41  
42  
43  
44  
45  
46  
47  
48  
49  
50  
51  
52  
53  
54  
55  
56  
57  
58  
59  
60

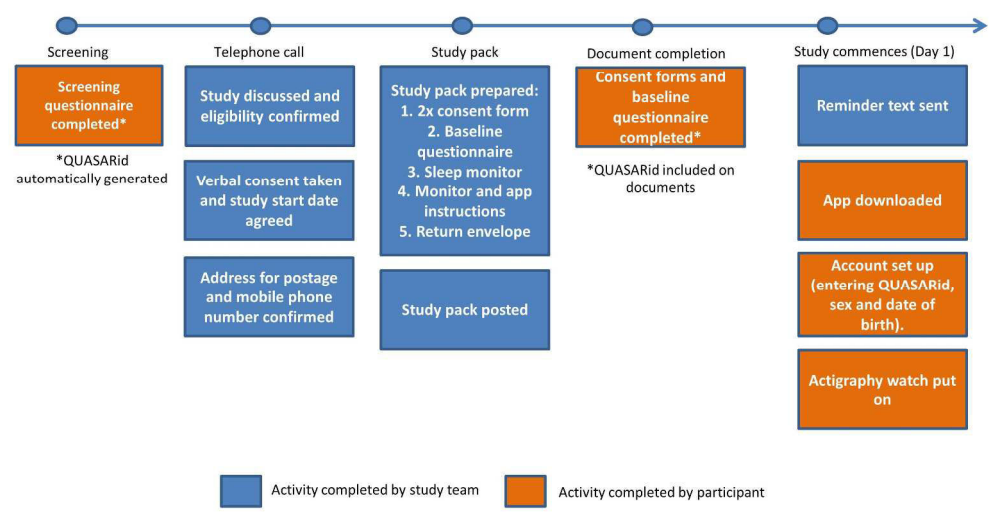

Figure 1 – Flow of participant entry into the study

254x190mm (300 x 300 DPI)

1  
2  
3  
4  
5  
6  
7  
8  
9  
10  
11  
12  
13  
14  
15  
16  
17  
18  
19  
20  
21  
22  
23  
24  
25  
26  
27  
28  
29  
30  
31  
32  
33  
34  
35  
36  
37  
38  
39  
40  
41  
42  
43  
44  
45  
46  
47  
48  
49  
50  
51  
52  
53  
54  
55  
56  
57  
58  
59  
60

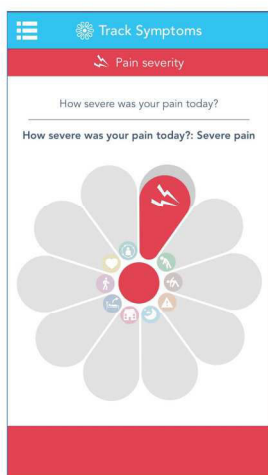

Figure 2 - Screenshot of uMotif study app

254x190mm (300 x 300 DPI)

View Only

1  
2  
3  
4  
5  
6  
7  
8  
9  
10  
11  
12  
13  
14  
15  
16  
17  
18  
19  
20  
21  
22  
23  
24  
25  
26  
27  
28  
29  
30  
31  
32  
33  
34  
35  
36  
37  
38  
39  
40  
41  
42  
43  
44  
45  
46  
47  
48  
49  
50  
51  
52  
53  
54  
55  
56  
57  
58  
59  
60

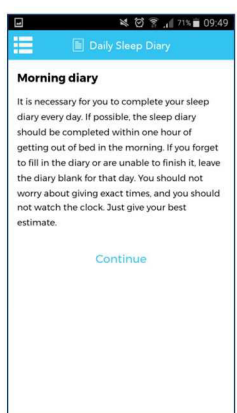

Figure 3 – Screenshot of consensus sleep diary within study app

254x190mm (300 x 300 DPI)

Peer review only

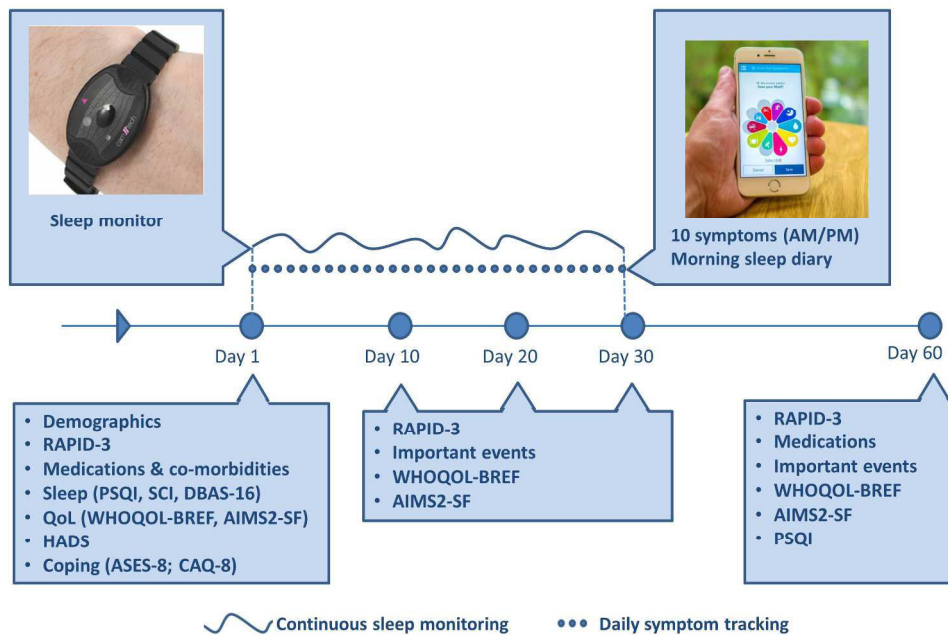

Figure 4 - Data collection and participant contact across 60 days for participants enrolled in QUASAR

254x190mm (300 x 300 DPI)

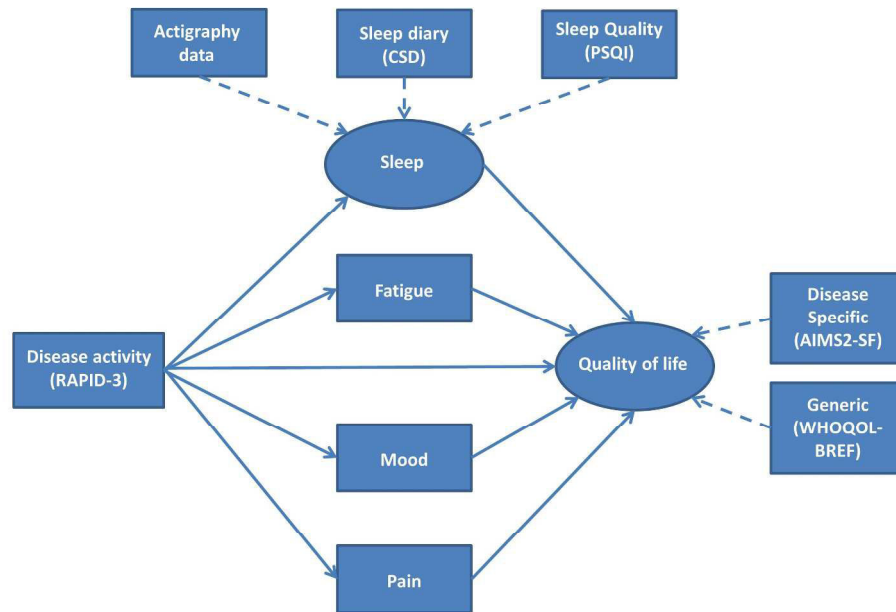

Figure 5 – Hypothetical model of the pathways of relationship between rheumatoid arthritis and quality of life disease severity, sleep, fatigue, mood, and pain– simple model. In this figure rectangles represent observed variables, and circles represent the constructs those variables represent. Solid arrows represent the pathways to be tested. RAPID-3: Routine Assessment of Patient Index Data 3, CSD: Consensus Sleep Diary, PSQI: Pittsburgh Sleep Quality Index, AIMS2-SF: Arthritis Impact Measurement Scale 2 - Short Form.

254x190mm (300 x 300 DPI)

# BMJ Open

## Quality of life, sleep and rheumatoid arthritis (QUASAR): A protocol for a prospective UK mHealth study to investigate the relationship between sleep and quality of life in adults with rheumatoid arthritis

|                                 |                                                                                                                                                                                                                                                                                                                                                                                                                                                                                                                                                                                                                                                                                                                                                                                                                                                                                                                                                                                                                                                                                    |
|---------------------------------|------------------------------------------------------------------------------------------------------------------------------------------------------------------------------------------------------------------------------------------------------------------------------------------------------------------------------------------------------------------------------------------------------------------------------------------------------------------------------------------------------------------------------------------------------------------------------------------------------------------------------------------------------------------------------------------------------------------------------------------------------------------------------------------------------------------------------------------------------------------------------------------------------------------------------------------------------------------------------------------------------------------------------------------------------------------------------------|
| Journal:                        | <i>BMJ Open</i>                                                                                                                                                                                                                                                                                                                                                                                                                                                                                                                                                                                                                                                                                                                                                                                                                                                                                                                                                                                                                                                                    |
| Manuscript ID                   | bmjopen-2017-018752.R1                                                                                                                                                                                                                                                                                                                                                                                                                                                                                                                                                                                                                                                                                                                                                                                                                                                                                                                                                                                                                                                             |
| Article Type:                   | Protocol                                                                                                                                                                                                                                                                                                                                                                                                                                                                                                                                                                                                                                                                                                                                                                                                                                                                                                                                                                                                                                                                           |
| Date Submitted by the Author:   | 08-Nov-2017                                                                                                                                                                                                                                                                                                                                                                                                                                                                                                                                                                                                                                                                                                                                                                                                                                                                                                                                                                                                                                                                        |
| Complete List of Authors:       | Druce, Katie; University of Manchester, Arthritis Research UK Centre for Epidemiology<br>Cordingley, Lis; Manchester University, Division of Musculoskeletal and Dermatological Sciences<br>Short, Vicky; University of Manchester, Arthritis Research UK Centre for Epidemiology<br>Moore, Susan; University of Manchester, Arthritis Research UK Centre for Epidemiology<br>Hellman, Bruce; uMotif<br>James, Ben; uMotif<br>Lunt, Mark; University of Manchester, Arthritis Research UK Centre for Epidemiology<br>Kyle, Simon; University of Oxford, Sleep and Circadian Neuroscience Institute, Nuffield Department of Clinical Neurosciences<br>Dixon, Will; University of Manchester, Arthritis Research UK Centre for Epidemiology; NIHR Manchester Musculoskeletal Biomedical Research Unit, Central Manchester University Hospitals NHS Foundation Trust<br>McBeth, John; University of Manchester, Arthritis Research UK Centre for Epidemiology; NIHR Manchester Musculoskeletal Biomedical Research Unit, Central Manchester University Hospitals NHS Foundation Trust |
| <b>Primary Subject Heading</b>: | Epidemiology                                                                                                                                                                                                                                                                                                                                                                                                                                                                                                                                                                                                                                                                                                                                                                                                                                                                                                                                                                                                                                                                       |
| Secondary Subject Heading:      | Rheumatology                                                                                                                                                                                                                                                                                                                                                                                                                                                                                                                                                                                                                                                                                                                                                                                                                                                                                                                                                                                                                                                                       |
| Keywords:                       | SLEEP MEDICINE, RHEUMATOLOGY, EPIDEMIOLOGY                                                                                                                                                                                                                                                                                                                                                                                                                                                                                                                                                                                                                                                                                                                                                                                                                                                                                                                                                                                                                                         |
|                                 |                                                                                                                                                                                                                                                                                                                                                                                                                                                                                                                                                                                                                                                                                                                                                                                                                                                                                                                                                                                                                                                                                    |

SCHOLARONE™  
Manuscripts

1  
2  
3 Quality of life, sleep and rheumatoid arthritis (QUASAR): A protocol for a prospective UK mHealth  
4 study to investigate the relationship between sleep and quality of life in adults with rheumatoid  
5 arthritis  
6  
7

8 Druce KL<sup>1\*</sup>, Cordingley L<sup>2</sup>, Short V<sup>1</sup>, Moore S<sup>1</sup>, Hellman B<sup>3</sup>, James B<sup>3</sup>, Lunt M<sup>1</sup>, Kyle S.D.<sup>4</sup>, Dixon WG<sup>1,5</sup>,  
9 McBeth J<sup>1,5</sup>  
10

11  
12 <sup>1</sup> Arthritis Research UK Centre for Epidemiology, University of Manchester, Manchester, UK.  
13

14  
15 <sup>2</sup> Division of Musculoskeletal and Dermatological Sciences, University of Manchester, Manchester UK  
16

17  
18 <sup>3</sup> uMotif, London, UK  
19

20  
21 <sup>4</sup> Sleep and Circadian Neuroscience Institute, Nuffield Department of Clinical Neurosciences.  
22 University of Oxford, Oxford, UK.  
23

24  
25 <sup>5</sup> NIHR Manchester Musculoskeletal Biomedical Research Centre, Central Manchester University  
26 Hospitals NHS Foundation Trust, Manchester, UK.  
27

28  
29 \*corresponding author:

30  
31 Katie Druce

32  
33 katie.druce@manchester.ac.uk; Arthritis Research UK Centre for Epidemiology, University of  
34 Manchester, Stopford Building, Oxford Road, Manchester, M13 9PT.  
35  
36  
37  
38  
39  
40  
41  
42  
43  
44  
45  
46  
47  
48  
49  
50  
51  
52  
53  
54  
55  
56  
57  
58  
59  
60

## Abstract

Introduction: People with rheumatoid arthritis (RA) frequently report reduced health-related quality of life (HRQoL), the impact one's health has on physical, emotional and social well-being. There are likely numerous causes for poor HRQoL, but people with RA have identified sleep disturbances as a key contributor to their well-being. This study will identify the circadian rest/activity rhythms that predict fluctuations in HRQoL in people with RA.

Methods and analysis: This prospective cohort study will recruit 350 people with RA, aged 18 years or older. Following completion of a paper-based baseline questionnaire, participants will record data on 10 symptoms including pain, fatigue, and mood twice-daily for 30 days using a study-specific mobile application (app). A tri-axial accelerometer will continuously record daytime activity and estimate evening sleep parameters over the 30 days. Every 10 days following study initiation participants will complete a questionnaire that measures disease specific (Arthritis Impact Measurement Scale 2 - Short Form (AIMS2-SF)) and generic (WHOQOL-BREF) quality of life. A final questionnaire will be completed at 60 days after entering the study. The primary outcomes are the AIMS2-SF and WHOQOL-BREF. Structural equation modelling (SEM) and latent trajectory models (LTM) will be used to examine determine the relationship between circadian rest/activity rhythms and HRQoL, over time.

Ethics and dissemination: Ethical approval for this study has been obtained from the National Research Ethics Service (REC ref: 17/NW/0217). Results from this study will be disseminated at regional and international conferences, in peer-reviewed journals and Patient and Public Engagement (PPE) events, as appropriate.

### Strengths and limitations of this study

1. This study will take advantage of advances in mobile health (mhealth) to embed data collection into the daily lives of participants.
2. Using a patient co-designed smartphone/tablet app it will capture objective and subjective sleep as well as self-reported symptoms.
3. Sophisticated structural equation modelling (SEM) and latent trajectory models (LTM) will enable the study to disentangle the complex relationship between sleep, HRQoL and other symptoms.
4. While the use of actigraphy allows the collection of objective sleep data, it is not able to inform investigation of the relationship between HRQoL and sleep architectural parameters or sleep oscillations (e.g., spindles, slow waves).



1  
2  
3 5. Potential sources of bias include a) sampling bias, if those recruited to this study are only those  
4 who experience sleep disturbances and/or are comfortable/familiar with using smartphone apps and  
5 activity monitors, and b) loss to follow-up bias if those who do not complete the full data collection  
6 protocol are systematically different from those who do.  
7

## 8 **Introduction**

9

10 Quality of life, sleep and rheumatoid arthritis (QUASAR) is a prospective cohort study which will use  
11 a patient designed smartphone/tablet app and accelerometer to collect information on sleep and  
12 health-related quality of life (HRQoL) in rheumatoid arthritis (RA).  
13  
14

15  
16 RA is a common chronic inflammatory disease characterised by joint damage, pain and disability<sup>1</sup>.  
17 The occurrence of RA is between two and four times greater in women and as many as 70% of men  
18 and women of working age with RA stop work within 10-15 years of disease duration due to the  
19 condition<sup>2,3</sup>. People with RA frequently report reduced HRQoL, which can be characterised as the  
20 impact one's health has on physical, emotional and social well-being. People with RA have poorer  
21 HRQoL when compared to those with other rheumatic diseases<sup>4</sup> or healthy peers<sup>5,6</sup>. Poor HRQoL  
22 may even persist when the disease is well controlled<sup>5</sup>.  
23  
24  
25  
26  
27

28 Although there are likely numerous causes for poor HRQoL, people with RA have identified sleep  
29 disturbances as a key contributor to their well-being<sup>7-9</sup>. It is well known that people with RA report  
30 substantial sleep disturbances<sup>10,11</sup>, such as less total sleeping time and unrefreshing sleep<sup>8</sup> and  
31 greater night time awakenings<sup>7,9</sup>. The cyclical nature of relationships between sleep disruptions and  
32 symptoms such as pain, fatigue and disability is relatively well characterised and likely cyclical<sup>12-14</sup>.  
33 However, few studies have determined the relationship between sleep and quality of life among RA  
34 populations.  
35  
36  
37  
38  
39

40 Studies which have investigated the relationship between sleep and HRQoL have tended to suggest  
41 that sleep problems are associated with poor HRQoL<sup>15-18</sup>. However, these studies have been of low  
42 quality and have been hampered by a number of methodological challenges, which preclude  
43 accurate assessment and understanding of the relationship between sleep and HRQoL. First and  
44 foremost, sleep is a multifaceted behaviour which comprises objective and subjective components<sup>19</sup>.  
45 Despite guidelines endorsing the measurement of both and the potential for discrepancy between  
46 subjective and objective reports<sup>20</sup>, it is only subjective sleep which has been commonly measured  
47 within epidemiological studies because, historically, it has been difficult to objectively measure sleep  
48 outside of artificial laboratory settings. Studies have also tended to be cross-sectional in design or to  
49 have used low-resolution longitudinal data collection protocols which have not been able to collect  
50 data regarding the recurrent and fluctuating day to day changes in sleep and associated symptoms.  
51  
52  
53  
54  
55  
56  
57

1  
2  
3 Now, advances in the availability of smartphone apps and wearables for health monitoring provide a  
4 hitherto unobtainable mechanism to collect regular self-reported symptoms and objective sleep  
5 data, while embedding data collection into participants' everyday lives. This study will use a  
6 combination of patient co-designed smartphone/tablet app (provided by uMotif, London, UK) and a  
7 tri-axial accelerometer (MotionWatch8, CamNtech, Cambridge, UK) to capture both subjective and  
8 objective assessments of sleep quality, continuity and duration, as well as the timing and stability of  
9 the periods of time when someone is asleep or active <sup>21</sup>. Furthermore, the uMotif app will be used to  
10 collect information about self-reported symptoms which were identified as priorities by patients in a  
11 series of focus groups and patient involvement activities. In doing so this study aims to identify the  
12 relationship between sleep parameters, aspects of the circadian rest/activity rhythms, and HRQoL in  
13 people with RA.  
14  
15  
16  
17  
18  
19  
20  
21  
22  
23  
24

#### 25 Study objectives

- 26 1. Describe baseline and period distribution of circadian rest/activity rhythms stratified by  
27 age, sex, socioeconomic status and disease characteristics.
- 28 2. Determine relative contributions of circadian rest/activity rhythms , pain, fatigue and  
29 mood to RA-HRQoL.
- 30 3. In an exploratory analysis examine whether the relationship between disease severity,  
31 circadian rest/activity rhythms , pain, fatigue, mood and RA-HRQoL are moderated by  
32 age and sex.
- 33 4. Estimate the potential effect on RA-HRQoL of a successful intervention targeted at the  
34 key identified pathway(s).  
35  
36  
37  
38  
39  
40  
41  
42  
43

#### 44 Experimental design and methods

#### 45 46 47 48 **Methods and analysis:**

#### 49 50 51 Study design

52  
53 We will conduct a prospective cohort study to investigate the relationships between sleep and  
54 HRQoL in people with RA.  
55  
56  
57

### *Identifying and recruiting potential participants*

Participants will be recruited via three channels. The primary source for participants will be the National Rheumatoid Arthritis Society (NRAS). NRAS is a national patient organisation with over 7000 members. Emails advertising the study will be sent to NRAS mailing list members and will include a copy of the study information pack comprising:

1. Study poster
2. Participant information sheet
3. Copy of the consent form (for information only)
4. A link to complete an online screening questionnaire

Following approval from the Health Research Authority (HRA) and via arrangements with Clinical Commissioning Groups (CCGs), participants will also be recruited via NHS mailing lists, where such mailing lists are available. NHS mailing lists provide the opportunity to search General Practitioner (GP) records for potentially eligible participants. Local Clinical Research Network (CRN) teams will search GP records for patients aged 18 or older, with a diagnosis of RA and who are in receipt of a Disease Modifying Anti-rheumatic Drug (DMARD), as recommended by Muller et al<sup>22</sup>. Letters will be sent to the identified patients, provided the GP or clinical team in the practice confirms that approaching the patient is acceptable. Reasons for not approaching patients may include previous refusal for records to be used for research, current hospitalisation, or belief that the participant is not capable of participation. Within the letter, participants will be briefly introduced to the study and persons interested in participating will be asked to email the study team directly for the study information pack, the contents of which are detailed above.

Information about the study will be displayed on the NIHR Clinical Research Network Portfolio to encourage NHS sites to support study recruitment by displaying posters advertising the study in any NHS Rheumatology clinics. NHS sites interested in supporting the study will contact the study team directly for further information and all relevant documentation needed to confirm they have the capacity and capability required to support the study. The displayed posters will provide brief information about the study and will ask persons interested in participating to email the study team directly for the study information pack, the contents of which are detailed above.

Following the receipt of the study information pack, potential participants follow an identical recruitment strategy (Figure 1).

1  
2  
3  
4 [Figure 1 here]  
5

6 *Figure 1 – Flow of participant entry into the study*  
7  
8  
9

### 10 **Screening questionnaire**

11 Persons who receive the study information pack and are interested in participating in the study will  
12 be asked to complete the study screening questionnaire. Potential participants are asked to record  
13 their sex and date of birth, and to confirm whether they a) have a diagnosis of RA (including date of  
14 diagnosis), b) are currently using DMARDs (biologic or conventional synthetic), c) have access to an  
15 Android or Apple smartphone or tablet. For the purposes of exclusion criteria, interested persons  
16 must also indicate whether they are currently employed in shift work. Finally, potential participants  
17 will be asked to give consent and contact details and preferred contact time (9am and 12 noon, 12  
18 noon and 3pm, 3pm and 6pm or 6pm and 8pm) to enable the study team to contact them to discuss  
19 participation in the study.  
20  
21  
22  
23  
24  
25

### 26 **Eligibility criteria**

27 Screening questionnaire respondents will be considered eligible for the study if they:  
28

- 29 • Are aged  $\geq 18$  years
  - 30 • Have a diagnosis of rheumatoid arthritis
  - 31 • Are currently using DMARDs (biologic or conventional synthetic)
  - 32 • Have access to an Android or Apple smartphone or tablet
- 33  
34  
35  
36

37 Respondents would be excluded from the study if they:

- 38 • Are currently employed in a job that requires shift work
- 39  
40  
41

### 42 **QUASARid**

43 Study participants will be asked to provide data via three different platforms: paper-based  
44 questionnaires, a study app (downloaded onto a smartphone or tablet), and a tri-axial accelerometer  
45 that will measure daytime physical activity and sleep. To ensure that the data collected across these  
46 platforms can be consistently and accurately linked and matched to each participant, a unique  
47 participant identifier will be generated for each participant. The unique identifier, known as a  
48 QUASARid, will be automatically generated as the unique survey response which is allocated to the  
49 participant when they commence the screening questionnaire.  
50  
51  
52  
53  
54  
55  
56  
57  
58  
59  
60

### ***Telephone call***

Potential participants meeting the study inclusion criteria will be telephoned by a member of the study team. To ensure they have had adequate time to review the participant information sheet provided in the study information email, telephone calls will take place no earlier than 24 hours after receipt of a completed screening questionnaire. A total of four attempts to contact the potential participant will be made on consecutive week days. During the phone call a verbal summary of the information sheet will be discussed with the potential participant and they will be given the opportunity to ask as many questions about the study as they wish.

### ***Verbal consent and agreement of study start date***

Following the verbal summary of the study information sheet, participants will be given the option to enrol into the study, delay participation, request more time to think about participation or decline to take part in the study. Written consent will subsequently be obtained by the completion of two paper copies of the consent form sent to participants within the study pack. The provided consent forms will be signed and dated by the team member responsible for recruitment at the point of obtaining verbal consent, with participants asked to complete their own signature at the time of completing the baseline questionnaire. One copy of the consent form will be returned by the participant at the end of their first 30 days in QUASAR, along with the actigraph watch and baseline questionnaire. The second copy is for the patients' personal records.

Once verbal consent has been obtained participants will be asked to agree to a study start date, which should be within 14 days of the telephone call taking place. Participants who are unable to commence the study within 14 days will be asked to delay entry into the study. Those who agree a study start date will be asked to confirm their preferred postal address to which the study packs will be sent and a mobile phone number. The mobile phone number will be used to send participants text messages on the agreed study start date and throughout the study to encourage data completion and study compliance.

### ***Study pack***

The provision of verbal consent also enables the study pack to be prepared and posted to participants in advance of the agreed study start date. The study pack will include a letter of introduction, two copies of the consent form and a paper copy of the baseline questionnaire. Participants will also be provided with instructions to download and use the study app, as well as an actigraph watch, called a MotionWatch8 (CamNtech, Cambridge, UK) and associated instructions.

1  
2  
3 The study pack will be sent from the University of Manchester using Special Delivery Guaranteed® to  
4 arrive no less than one day prior to the study start date.  
5  
6

### 7 ***Document completion – Consent form and baseline questionnaire***

8  
9  
10 Participants are requested to complete paper copies of the consent form and baseline questionnaire  
11 (sent within the study pack) on or before the first day of symptom monitoring. Initially, the baseline  
12 questionnaire was incorporated into the study app to be completed as part of the on-boarding  
13 process. However, due to limits on the number of questions which could be displayed per screen  
14 and the associated time required for data completion, app testing with the study team and members  
15 of a focus group indicated that this method of delivery would be less acceptable to participants than  
16 a paper based document.  
17  
18

19  
20  
21 The participant's QUASARid will be written onto both the consent form and covering page of the  
22 baseline questionnaire to enable data linkage between these documents, the study app and  
23 actigraph watch. To encourage completion of the questionnaire in advance of the monitoring period,  
24 participants will be asked to indicate the date on which they have completed the questionnaire on  
25 the covering page. They will return the baseline questionnaire along with the monitor at the end of  
26 the study.  
27  
28

29  
30  
31 The baseline questionnaire will comprise three sections: Demographic information, information  
32 about RA and health status information.  
33  
34

#### 35 **Demographics**

36  
37  
38 Participants will record a number of demographic variables, including sex, date of birth, weight and  
39 height, ethnicity, age left education, average weekly alcohol consumption, smoking status,  
40 occupational status, marital status and postcode. Participants will also indicate how likely they  
41 believe it is that sleep affects their quality of life and the impact that RA has on their work  
42 productivity. A description of the reporting of these items is shown in Table 1.  
43  
44

#### 45 **Information about RA**

#### 46 ***Disease activity***

47  
48  
49 Participants will record the month and year of their diagnosis. Disease activity will be assessed using  
50 the Routine Assessment of Patient Index Data 3 (RAPID-3). The 15 item RAPID-3 is free to use and  
51  
52

1  
2  
3 has been validated in RA populations. The measure has good validity and acceptable reliability and  
4 responsiveness<sup>23</sup>.  
5

6  
7 The RAPID-3 measures 3 domains: physical function (13 discrete response items), pain (1 item 0-10  
8 numerical rating scale (NRS)) and global health (1 item 0-10 NRS)) in the past week. The first 10  
9 items of the physical function domain are scored, transformed into a 0.3-10 scale and summed with  
10 the pain and global health domains to produce an overall score of 0-30. These overall scores are  
11 then converted into a weighed RAPID 3 score and categorised within the following disease activity  
12 score categories: Near remission (0.3-1.0), Low Severity (1.3-2.0), Moderate severity (2.3-4.0), High  
13 severity (4.3-10).  
14  
15  
16  
17

### 18 19 *Co-morbid rheumatic disease(s) and sleep-related problem(s), and menopausal status*

20  
21  
22 Participants will be asked to record the presence of a variety of other rheumatic diseases, co-  
23 morbidities which may affect sleep (e.g. Sjogren's syndrome, diabetes, multiple sclerosis,  
24 hypertension (Table 1)) and menopausal status.  
25

26  
27  
28 For pragmatic reasons it was not possible to embed specific questionnaires about the presence,  
29 severity or impact of sleep disorders, as it was necessary to balance the availability of data with  
30 minimal participant burden of data completion. Nevertheless, because the presence of such  
31 disorders represent important co-variables which should be adjusted for within data analysis,  
32 participants will be asked to record whether they experience restless leg syndrome and obstructive  
33 sleep apnea/snoring, A full list of co-morbidities collected is shown in Table 1.  
34  
35  
36

37  
38 Insomnia is recorded using the Sleep Condition Indicator (SCI), an 8 item questionnaire which has  
39 good concurrent validity, high internal consistency and is sensitive to change<sup>24</sup>. The SCI performs  
40 well to detect possible insomnia disorder and is the only validated and widely used insomnia  
41 measure that indexes insomnia disorder against contemporary criteria (e.g. International  
42 Classification of Sleep Disorders (ICSD-3); The Diagnostic and Statistical Manual of Mental Disorders  
43 (DSM-5))<sup>24</sup>.  
44  
45  
46  
47

### 48 49 *Medications*

50  
51 Participants will also be asked to record the use of medications including analgesics (e.g.  
52 Paracetamol, Nonsteroidal anti-inflammatories (NSAIDs) and opiates and disease modifying anti-  
53 rheumatic drugs (DMARDs, e.g. glucocorticoids, biologic DMARDs). The use of sleep medications,  
54 including sedatives or hypnotics, mood stabilisers, antidepressants, other sleep medications (e.g.  
55  
56  
57

1  
2  
3 Chlorpromazine, Haloperidol) will also be collected and participants will be given a free-text box to  
4 record other medications or coping strategies they use and the purpose for using the strategy (Table  
5 1).  
6  
7  
8  
9

### 10 *Quality of life (QoL)*

11  
12  
13 As is recommended<sup>25</sup>, participants will complete a generic and disease specific measure of HRQoL.  
14 Generic HRQoL will be reported using the WHOQOL-BREF, a 26 item instrument which measures 6  
15 domains in the past 14 days: overall perception of HRQoL (1 discrete response item), health (1  
16 discrete response item), physical (7 discrete response items), psychological (6 discrete response  
17 items), social relationships (3 discrete response items) and environment (8 discrete response items).  
18 The items from each domain are summed and transformed into a 0-100 score, where higher scores  
19 indicate better HRQoL<sup>26</sup>. The WHOQOL-BREF has good internal consistency, discriminant validity  
20 (i.e. discriminating ill versus well groups) and sensitivity to change<sup>26</sup>.  
21  
22  
23  
24  
25

26  
27 Disease specific HRQoL will be reported using the 26 item Arthritis Impact Measurement Scale 2  
28 (Short Form) (AIMS-2 SF). The AIMS-2 SF uses discrete response items to capture 5 domains within a  
29 4 week recall period: physical (13 items), symptom (3 items), affect (4 items), social interaction (4  
30 items) and role (2 items). After some items are reverse coded, domain items are summed and  
31 converted into a 0-10 scale, where higher scores indicate poorer HRQoL<sup>27</sup>. The AIMS-2 SF shows  
32 good internal consistency and acceptable construct validity. The scale also generally demonstrates  
33 promising evidence of sensitivity to change, but there is less evidence supporting this for social  
34 interaction and role subscales<sup>27</sup>.  
35  
36  
37  
38  
39

40 Participants will also be asked to use a free text box to indicate the top 3 things which are most  
41 important to them to ensure they have good quality of life.  
42  
43  
44

### 45 *Sleep quality and beliefs about sleep*

46  
47 Sleep quality in the past month will be measured using the Pittsburgh Sleep Quality Index (PSQI), the  
48 most widely used measure within clinical and research settings<sup>28</sup>. The 18 item instrument comprises  
49 7 domains: sleep quality (1 discrete response item), sleep latency (1 free-text item; 1 discrete  
50 response item), sleep duration (1 free-text item), sleep efficiency (2 free-text items), sleep  
51 disturbances (9 discrete response items), sleep medications (1 discrete response item), daytime  
52  
53  
54  
55  
56  
57  
58  
59  
60



1  
2  
3 dysfunction (2 discrete response items). The PSQI has good reliability and validity<sup>28</sup> and  
4 demonstrates good sensitivity and specificity to distinguish good and poor sleepers<sup>29</sup>.  
5

6  
7 Participants will also record information regarding their beliefs about sleep using the 16 item  
8 Dysfunctional Beliefs and Attitudes about Sleep instrument (DBAS-16). Beliefs about causes,  
9 consequences, and treatment of sleep problems are rated on 11-point Likert scales ranging from 0  
10 (strongly disagree) to 10 (strongly agree). Scores are summed and averaged to produce a mean item  
11 score where higher scores indicate stronger endorsement of maladaptive beliefs about sleep<sup>30</sup>. The  
12 DBAS-16 has good internal consistency and test-retest reliability<sup>30</sup>.  
13  
14  
15

### 16 17 *Mood, self-efficacy and cognitive flexibility*

18  
19  
20 Finally, mood, self-efficacy and cognitive flexibility will be measured as important co-variables which  
21 may affect the relationship between sleep and HRQoL. Mood, specifically anxiety and depression,  
22 will be measured using the 14 item Hospital Anxiety and Depression Scale (HADS)<sup>31</sup>. Anxiety (7  
23 items) and depression (7 items) in the preceding week are reported using discrete response  
24 questions, scored 0-3). Subscale items are summed to produce a score of 0-21, where higher scores  
25 represent poorer mood<sup>31</sup>. Scores tend to be categorised as 0-7 “normal”, 8-10 “borderline”, >11  
26 “caseness”. The HADS is well accepted and has strong internal consistency and high test-retest  
27 reliability<sup>31</sup>.  
28  
29  
30  
31  
32  
33

34 Self-efficacy will be assessed using the Arthritis Self-Efficacy Scale-8 item (ASES-8)<sup>32</sup>, which will  
35 record information about participants’ self-efficacy for pain (2 0-10 NRS), preventing pain & fatigue  
36 interference(2 0-10 NRS), and for other symptoms(4 0-10 NRS). A self-efficacy score, ranging  
37 between 1 and 10, is produced by summing all items and calculating the mean value<sup>32</sup>. Higher scores  
38 indicate better self-efficacy. The ASES-8 has been shown to have good reliability, validity and  
39 sensitivity to change<sup>32</sup>.  
40  
41  
42  
43

44 Cognitive flexibility will be recorded using the Committed Action Questionnaire (CAQ-8), to assess  
45 participants’ abilities to persist with or change behaviour in relation to their present situation<sup>33</sup>. The  
46 CAQ-8 comprises 4 positive, and 4 negative, commitment to action subscales, which are recorded  
47 using 7-point Likert scales. An overall flexibility is scored by reverse coding the negative commitment  
48 subscales and summing all items, with higher scores indicating greater flexibility<sup>33</sup>. The CAQ-8 has  
49 been shown to have good reliability and internal consistency<sup>33</sup>.  
50  
51  
52  
53  
54  
55  
56  
57  
58  
59  
60

| Table 1 – Baseline questionnaire domains and scales            |                                                                                                                                                                                                                                                                                                                                                           |
|----------------------------------------------------------------|-----------------------------------------------------------------------------------------------------------------------------------------------------------------------------------------------------------------------------------------------------------------------------------------------------------------------------------------------------------|
| Domain                                                         | Scales/measurement                                                                                                                                                                                                                                                                                                                                        |
| Demographics                                                   |                                                                                                                                                                                                                                                                                                                                                           |
| Sex                                                            | Tick box – male or female                                                                                                                                                                                                                                                                                                                                 |
| Date of birth                                                  | Day, month, year                                                                                                                                                                                                                                                                                                                                          |
| Height and Weight                                              | Free text (metric or imperial)                                                                                                                                                                                                                                                                                                                            |
| Ethnicity                                                      | Free text                                                                                                                                                                                                                                                                                                                                                 |
| Age left education                                             | Free text                                                                                                                                                                                                                                                                                                                                                 |
| Smoking status                                                 | Tick box – current, ex-, or never smoker                                                                                                                                                                                                                                                                                                                  |
| Occupational status                                            | Tick box – working full time, working part time, student, medically retired, voluntary worker, unemployed but seeking work or retired                                                                                                                                                                                                                     |
| Marital status                                                 | Tick box – Single, in a relationship, co-habiting, married, civil partnership, separated, divorced or widowed                                                                                                                                                                                                                                             |
| Alcohol consumption                                            | Tick box –average units per week: 0, 1-5, 6-10, 11-15, 16-20, 21-40, >40                                                                                                                                                                                                                                                                                  |
| Impact of RA on work                                           | Work productivity question from Work Productivity and Activity Impairment – specific health problem (WPAI-SHP)                                                                                                                                                                                                                                            |
| Postcode                                                       | Free text for first half of postcode                                                                                                                                                                                                                                                                                                                      |
| Belief that sleep affects HRQoL                                | 0-10 NRS: 0 “Not at all likely”, 10 “Very likely”                                                                                                                                                                                                                                                                                                         |
| Information about RA                                           |                                                                                                                                                                                                                                                                                                                                                           |
| Date of RA diagnosis                                           | Month and year                                                                                                                                                                                                                                                                                                                                            |
| Disease activity                                               | Routine Assessment of Patient Index Data 3 (RAPID-3)                                                                                                                                                                                                                                                                                                      |
| Co-morbid rheumatic disease(s) and sleep-related problem(s)    | Check list – osteoarthritis, spondyloarthropathy/ankylosing spondylitis, fibromyalgia/chronic widespread pain, gout or other crystal arthritis, Sjogren’s syndrome, restless leg syndrome, obstructive sleep apnea/snoring, thyroid disorder, diabetes, multiple sclerosis, hypertension.                                                                 |
| Menopausal status                                              | Tick box – yes/no                                                                                                                                                                                                                                                                                                                                         |
| Current medication(s) and non-pharmacological intervention use | Check list – paracetamol, non-steroidal anti-inflammatory drugs (NSAIDs), other analgesics, weak opiates, strong opiates, drugs for neuropathic pain, glucocorticoids, synthetic disease modifying anti-rheumatic drugs (DMARDs), biologic DMARDs, sedatives (or hypnotics), mood stabilisers, antidepressants, other sleep medications.<br>Free-text box |
| Health status information                                      |                                                                                                                                                                                                                                                                                                                                                           |
| Disease specific quality of life                               | Arthritis Impact Measurement Scale 2 - Short Form (AIMS2-SF)                                                                                                                                                                                                                                                                                              |
| Generic Quality of life                                        | WHOQOL-BREF                                                                                                                                                                                                                                                                                                                                               |
| Prioritisation domains for good HRQoL                          | Participants are asked to use a free text box to indicate top 3 things which are most important to them to ensure they have good quality of life.                                                                                                                                                                                                         |
| Sleep quality                                                  | Pittsburgh Sleep Quality Index (PSQI)                                                                                                                                                                                                                                                                                                                     |
| Beliefs about sleep                                            | Dysfunctional Beliefs and Attitudes about Sleep questionnaire (DBAS-16)                                                                                                                                                                                                                                                                                   |
| Insomnia                                                       | Sleep Condition Indicator (SCI)                                                                                                                                                                                                                                                                                                                           |

|                       |                                               |
|-----------------------|-----------------------------------------------|
| Mood                  | Hospital Anxiety and Depression Scale (HADS)  |
| Self-efficacy         | Arthritis Self-Efficacy Scale-8 item (ASES-8) |
| Cognitive flexibility | Committed Action Questionnaire (CAQ-8)        |

### ***Study commences (Day 1)***

On the agreed study start date, participants will receive a text message on the mobile phone number provided during the recruitment process. The reminder text message will ask participants to put on their activity monitor and to download the study app and register for an account. It will also include a study password, which will unlock the app to allow the participant to commence full registration, and a reminder of their QUASARid, which must be entered during the registration process to enable data linkage between the study app, actigraph watch and paper questionnaires.

### ***App installation and account set up***

Instructions about how to download the study app, which can be installed onto the participants' Apple or Android smartphone, tablet or both, will be included within the study pack that will be posted to participants. Once the app is installed participants will be asked to:

- complete a standard registration form (including creation of a username and password)
- enter their unique QUASARid, sex and date of birth, to enable linkage between the study's different data collection platforms

Registrations will be monitored via a live database, held by uMotif, of the data collected by the study app, to which the study team is provided secure access. All data provided by participants using the study app will be immediately transferred to uMotif server and visible in the database in real-time via 3G/4G/ Wifi. Any participants who have not registered with the app on their agreed start date, or within a 5 day window of that date, will be contacted by the study team to understand what issues may have arisen. If appropriate, participation in the study may be rescheduled for a later date.

### ***Data collection***

1  
2  
3 Following app-installation and the completion of the baseline questionnaire, participants will  
4 commence data collection lasting a total of 60 days. The first 30 days of the study comprise the  
5 continuous data collection phase of the study during which time participants wear the actigraph  
6 watch 24 hours a day and complete a once-daily sleep diary and twice daily symptom reports. During  
7 this 30 day monitoring period participants will also complete follow-up questionnaires on days 10,  
8 20 and 30 of the study. No data are recorded between days 31 and 59, but participants are asked to  
9 complete a final follow-up questionnaire on day 60 of the study.  
10  
11  
12  
13  
14  
15  
16

17 During focus groups conducted to inform the design of this study, participants discussed a desire to  
18 have options for on-going support from the study team via telephone contact. For that reason we  
19 will send personalised messages on days 5, 15 and 25 to encourage participation and give the  
20 participant the option to email or telephone the study team if they would like to discuss any issues  
21 or concerns. Any emails or requests for telephone calls will be responded to by the study's post-  
22 doctoral research associate, or principal investigator, at the earliest possible opportunity, and no  
23 later than one working day after the response is received.  
24  
25  
26  
27  
28

29 A full outline of the data collected is provided below.  
30  
31  
32  
33

#### 34 ***Day 1-30 – Actigraph watch and uMotif app***

35  
36 Continuous monitoring of sleep and physical activity.  
37  
38

39 Participants will wear the MotionWatch 8 (MW8; CamNtech, Cambridge, UK) for 24 hours a day over  
40 the 30 days of continuous data collection. The MW8 is a Class I Medical device which conforms to  
41 the essential safety and health requirements and provisions of EC Council Directives 93/42.EEC,  
42 Annex VII. The MW8 requires a standard watch battery (CR2032) which is replaced each time the  
43 watch is used. The configuration of the MW8 for the present study will enable the watch to collect  
44 data for up to 45 days, providing an additional two week window for data to be collected in  
45 instances where study entry may have been delayed.  
46  
47  
48  
49  
50

51 The MW8 monitors limb or bodily movements during daily living and sleep at 30 second time points  
52 (epochs) using a tri-axial accelerometer. It is waterproof for up to 1 hour at 1 meter and is therefore  
53 suitable for use while swimming or showering. Participants are instructed to wear the MW8 on their  
54 non-dominant wrist.  
55  
56  
57

1  
2  
3 Actigraphy has been validated against polysomnography (PSG) data<sup>34</sup>. The MW8 has been shown to  
4 provides reliable estimates for both sleep (including sleep latency, duration, efficiency, and  
5 fragmentation) and physical activity when worn for at least 14 days<sup>35-37</sup>, and has a number of  
6 practical features which make it suitable for the purposes of this study, including an event marker  
7 and prolonged battery life. Furthermore, the MW8 was specifically selected by participants invited  
8 to a research design focus group, who identified the MW8 as their preferred device due to the  
9 comfort of wearing it and the lightweight and unobtrusive design.  
10  
11  
12  
13

14 There is no real-time transmission of actigraphy data because the data are stored on the watches  
15 internal memory and can only be downloaded via a USB connection. It will therefore not be possible  
16 to assess participant compliance until after data collection has been completed and the actigraph  
17 watch is returned.  
18  
19  
20

21 Following the receipt and download of actigraphy data the following variables will be extracted: total  
22 sleep time (the total time spent in sleep according to the epoch-by-epoch wake/sleep  
23 categorisation), sleep onset latency (the time which elapsed between the participant getting into  
24 bed and the participant falling asleep) and sleep efficiency (the total sleep time, expressed as a  
25 proportion of the total times pent in bed). The sleep fragmentation index, a measure of the degree  
26 of sleep discontinuity, will be calculated as a percentage of the total time categorised as mobile in  
27 the epoch-by-epoch mobile/immobile categorisation and the number of immobile bouts which were  
28 less than or equal to one minute in length.  
29  
30  
31  
32  
33

#### 34 35 Daily symptom reporting

36 During the 30 day continuous data collection, participants will be asked to use the uMotif study app  
37 to report their experience of daily symptoms. Within the app, the unique 'motif' interface is used by  
38 patients to simply track their daily symptoms. The motif which comprises 10 symptom segments,  
39 such as pain severity as is highlighted in Figure 2. The uMotif study app has been used in multiple  
40 ethics-approved studies, capturing over 64 million data points from patients using their own  
41 devices. The uMotif app has been specifically configured to capture the data required for the  
42 QUASAR study.  
43  
44  
45  
46  
47  
48  
49  
50  
51

52 [Figure 2 here]

53  
54 *Figure 2 - Screenshot of uMotif study app*  
55  
56  
57

1  
2  
3 Participants will receive prompts twice daily to complete the symptom ratings, once in the morning  
4 and once in the afternoon/evening. Symptom data are scored on an ordinal scale of 1-5 and are  
5 recorded by touching and sliding the relevant segment within the motif. The symptoms to be  
6 recorded (Table 2) were defined and agreed with consultation of participants in focus groups<sup>38</sup>.  
7  
8

9  
10 Throughout the study participants will receive reminders via the study app to complete the  
11 symptom assessments at 8am and 6pm. Participants will be able to provide additional symptom  
12 reports throughout the day at their discretion.  
13  
14

15  
16  
17  
18  
19  
20  
21  
22  
23  
24  
25  
26  
27  
28  
29  
30  
31  
32  
33  
34  
35  
36  
37  
38  
39  
40  
41  
42  
43  
44  
45  
46  
47  
48  
49  
50  
51  
52  
53  
54  
55  
56  
57  
58  
59  
60

For peer review only

| Table 2- Daily symptoms to be captured by the uMotif study app |                                                           |                            |                             |
|----------------------------------------------------------------|-----------------------------------------------------------|----------------------------|-----------------------------|
| Symptom                                                        | Question                                                  | Anchor 1 (centre of motif) | Anchor 5 (outside of motif) |
| Pain                                                           | How severe is your pain?                                  | No Pain                    | Very Severe Pain            |
| Fatigue                                                        | How severe is your fatigue?                               | No Fatigue                 | Very Severe Fatigue         |
| Mood                                                           | How is your mood?                                         | Depressed                  | Very Happy                  |
| Well-being                                                     | How well do you feel?                                     | Very Well                  | Very Unwell                 |
| Anxiety                                                        | How anxious do you feel?                                  | Very Well                  | Very Anxious                |
| Illness impact                                                 | How much is your illness impacting on your activities?    | No Impact                  | Very Severe Impact          |
| Disease control                                                | How much control do you feel you have over your symptoms? | No Control                 | Very Good Control           |
| Challenge                                                      | How challenging are you finding today?                    | Not Challenging            | Severely Challenging        |
| Sleepiness                                                     | How sleepy do you feel?                                   | Not Sleepy                 | Very Sleepy                 |
| Concentration                                                  | How would you rate your concentration?                    | Poor                       | Excellent                   |

The completion of these symptom data can be continually monitored via a live database, held by uMotif, of the data collected by the study app, to which the study team is provided secure access. As all data provided by participants using the study app are immediately transferred to uMotif server in real-time via 3G/4G/ Wifi, it will be possible for the study team to produce daily reports to monitor whether participants are completing their data in line with the study protocol.

A window of two consecutive days during the 30 day continuous monitoring period will be considered an acceptable period of non-completion for the daily symptom reports, sleep diaries and follow-up questionnaires. After this point, participants will receive a single reminder text message to encourage them to recommence data entry or contact the study team to discuss any concerns or issues, as appropriate.

### ***Day 2-31 – Consensus Sleep Diary***

The reminder sent to participants at 8am will also ask them to complete the 9 item Consensus Sleep Diary (CSD). This diary, which is completed in a separate section of the study app ([figure 3 here]

*Figure 3*), pertains to the previous night's sleep. To ensure coverage of all 30 nights of actigraphy data collection, it will be completed on the morning of days 2-31. Participants will receive an

1  
2  
3 automatically generated reminder every morning at 8am to complete the CSD, but are able to  
4 complete the diary earlier if they wish.  
5  
6  
7

8  
9 [figure 3 here]

10  
11 *Figure 3 – Screenshot of consensus sleep diary within study app*  
12  
13

14  
15 The 9 item CSD asks participants to record the time they got into bed, when they tried to sleep, how  
16 long it took to fall asleep, number and duration of night time awakenings, the time of final  
17 awakening, when they got out of bed, sleep quality, and how refreshed they felt upon awakening.  
18 The CSD is widely considered to be a gold-standard sleep diary, having been developed through the  
19 collaboration of sleep experts and potential users<sup>39;40</sup>. An additional 4 items will ask participants to  
20 report the duration of morning stiffness (in minutes), emotional strength, motivation and worry  
21 about sleeping the previous evening.  
22  
23  
24  
25  
26

27 As with the symptom reports, it will be possible to continually monitor sleep diary completion using  
28 the live database, held by uMotif. The study team will therefore produce daily reports to monitor  
29 whether participants are completing their sleep diaries in line with the study protocol. Any  
30 participant who does not complete their sleep diary for more than two days will receive a single  
31 reminder text message to encourage them to recommence data entry or contact the study team to  
32 discuss any concerns or issues, as appropriate. It will not be possible to retrospectively complete the  
33 sleep diaries for missing days.  
34  
35  
36  
37  
38  
39  
40  
41

#### 42 ***Day 10, 20 and 30 – HRQoL, disease activity and life events***

43

44 A number of follow-up questionnaires will be used throughout the study (Table 3). Prompts to  
45 complete the questionnaires will be sent. Requests to complete the follow-up questionnaires will be  
46 delivered to participants, via the app to participants, on the day they are to be completed when they  
47 open the study app. These reminders will be automatically generated and sent from uMotif and  
48 cannot be personalised. The questionnaires completed at days 10, 20 and 30 will capture the below  
49 items:  
50  
51  
52  
53

- 54 • Disease specific quality of life – AIMS2-SF
  - 55 • Generic quality of life – WHOQOL-BREF
- 56  
57  
58  
59  
60



- Disease activity - RAPID-3
- Occurrence of important events

As with all data collected via the study app, the data recorded in each follow-up questionnaire will be immediately transferred to uMotif server in real-time via 3G/4G/ Wifi. Completion of follow-up questionnaires will be monitored within daily reports produced by the study team and any participant who has not completed their questionnaire within two days of the required date will receive a single reminder text message to request that they complete the questionnaire as soon as possible. Participants will be given instructions to manually access and complete the follow-up questionnaire forms or contact the study team to discuss any concerns or issues, as appropriate.

Following the 30 days of data collection, participants will receive a text message to remind them to stop wearing the activity monitor and to send it back to the study team at the earliest convenient time, using the provided return addressed envelope. The envelopes, to which the relevant postage will be attached to return the package using Royal Mail Signed For® 1<sup>st</sup> Class must be returned via the local postage to obtain proof of postage; participants will not be required to pay any additional postage to obtain this. In instances where the watch does not appear to have been dropped off at the Post Office within 5 days of the expected end date, the study team will contact the participant.

Participants are not expected to continue tracking their symptoms or using the study app for continuous monitoring after day 30 and at this point participants may wish to uninstall the study app. For that reason, as the completion of the study's final questionnaire will occur 30 days after the continuous data collection phase has ended (day 60), participants may no longer be using the app and may have uninstalled it from their devices. Within the text message sent on day 30 of the study to congratulate participants on completing the continuous monitoring phase, participants will be asked to advise the study team if they would like to receive a paper copy of the final follow-up questionnaire.

#### ***Day 60 – Final follow-up questionnaire***

The study's final follow-up questionnaire will be completed at day 60. It is assumed that those who do not request a paper copy will be happy to complete the questionnaire using the app. Participants will be prompted to complete the questionnaire by reminders automatically generated and sent from uMotif. As before these reminders are generic and cannot be personalised.

The questionnaire will capture:

- Disease specific quality of life – AIMS2-SF
- Generic quality of life – WHOQOL-BREF
- Prioritisation of domains - participants asked to use a free text box to indicate the top 3 things which are most important to them to ensure they have good quality of life.
- Disease activity - RAPID-3
- Current medication(s) and non-pharmacological intervention use
- Sleep quality – PSQI
- Occurrence of important events

|                                                                | Pre-registration | Day ≤1 (paper) | Day 10 (app) | Day 20 (app) | Day 30 (app) | Day 60 (app/paper) |
|----------------------------------------------------------------|------------------|----------------|--------------|--------------|--------------|--------------------|
| Screening questionnaire                                        | X                |                |              |              |              |                    |
| Demographics                                                   |                  | X              |              |              |              |                    |
| Information about RA                                           |                  | X              |              |              |              |                    |
| RAPID- 3                                                       |                  | X              | X            | X            | X            | X                  |
| Current medication(s) and non-pharmacological intervention use |                  | X              |              |              |              | X                  |
| AIMS2-SF                                                       |                  | X              | X            | X            | X            | X                  |
| WHOQOL-BREF                                                    |                  | X              | X            | X            | X            | X                  |
| PSQI                                                           |                  | X              |              |              |              | X                  |
| DBAS-16                                                        |                  | X              |              |              |              |                    |
| SCI                                                            |                  | X              |              |              |              |                    |
| HADS                                                           |                  | X              |              |              |              |                    |
| ASES-8                                                         |                  | X              |              |              |              |                    |
| CAQ-8                                                          |                  | X              |              |              |              |                    |

A complete overview of data collection and participant contact is shown in Figure 4.

[Figure 4 here]

*Figure 4 - Data collection and participant contact across 60 days for participants enrolled in QUASAR*

*Sample size*

1  
2  
3 Following published guidance<sup>41;42</sup>, A sample size calculation has been conducted to determine a  
4 minimum sample size required to enable the study to conduct structural equation modelling (SEM).  
5 A conservative minimum effect size (defined as correlations between pairs of latent variables) of 0.2  
6 (rated as small). Based on our hypothesized model using baseline and 60 day measurements,  
7 containing 13 observed variables and 4 latent variables, with a significance level of 5% and power of  
8 80%, a minimum sample size of 166 participants is required. Recommended sample sizes for latent  
9 growth curve analyses are defined in relation to the number of participants and the number of  
10 repeated observations and suggest a minimum number of 100 participants should complete at least  
11 3 data points<sup>43</sup>. Our minimum sample size required and data collection protocol are therefore in  
12 excess of the requirements for latent growth curve analyses. In this study 50 actigraph watches will  
13 be obtained. This means that the maximum capacity for concurrent data collection is 50 and that  
14 data collection will be conducted in waves.

15  
16 Using data from previous studies we conservatively estimate that: a total of 3500 questionnaires  
17 mailed will provide 1750 (50%) returned and completed screening questionnaires, 350 (20%) will  
18 agree to take part and 175 (50%) will provide complete useable data, in excess of the minimum 166  
19 persons required for the analysis. It is important that a representative sample of people with RA is  
20 enrolled into the study. However, Data regarding the characteristics (e.g. age and sex) of persons  
21 who receive information about the study will not be available through the proposed recruitment  
22 channels. The presence of sampling bias will be examined for by comparing the age and sex  
23 distribution of UK population data (Table 4) to a) persons who complete and return screening  
24 questionnaires and b) recruited participants to available.

### 25 26 27 28 29 30 31 32 33 34 35 36 37 38 39 40 41 42 *Recruitment*

43  
44 In order to manage the flow of participants into the study and given the limited number of actigraph  
45 watches available, NRAS have agreed to contact mailing list members in 7 regionally-stratified  
46 recruitment waves in order that actigraph watches can be returned by earlier participants, prepared  
47 and sent out to future participants. The dates of each wave are listed below:

48  
49  
50  
51  
52 Wave 1 – 8 May 2017

53  
54 Wave 2 – 17 July 2017

55  
56 Wave 3 – 25 September 2017

1  
2  
3 Wave 4 – 4 December 2017

4 Wave 5 – 12 February 2018

5  
6 Wave 6 – 23 April 2018

7  
8 Wave 7 – 2 July 2018

9  
10  
11 The identification of GP practices and NHS Rheumatology clinics able to support recruitment to the  
12 QUASAR study will occur throughout the study. Once identified, the letters sent to potential  
13 participants identified via the screening of GP records will be sent to coincide with the above mailing  
14 waves used by NRAS. Participants who see information about the study in NHS Rheumatology clinics  
15 will be free to contact the study team at any point, however their enrolment into the study will be  
16 restricted to coincide with the above mailing waves.  
17  
18  
19

### 20 21 *Targeted recruitment*

22  
23  
24 The study's third objective is to examine whether the relationships between sleep and HRQoL are  
25 moderated by age and sex. It is therefore important to ensure that a representative sample of  
26 people with RA are enrolled into the study. Table 4 displays the estimated UK prevalence of RA and  
27 demonstrates that women are around three times more likely to be affected than men, and the  
28 increased prevalence of RA in older populations<sup>2</sup>.  
29  
30  
31  
32

33  
34 **Table 4- The prevalence of rheumatoid arthritis in the UK**

| 35 Age                    | 36 Males (%) | 37 UK estimate | 38 Females (%) | 39 UK estimate |
|---------------------------|--------------|----------------|----------------|----------------|
| 40 16–44                  | 41 0.02      | 42 2,500       | 43 0.12        | 44 15,100      |
| 45 45–64                  | 46 0.58      | 47 42,900      | 48 1.67        | 49 126,900     |
| 50 65–74                  | 51 1.14      | 52 27,100      | 53 2.56        | 54 67,800      |
| 55 75+                    | 56 2.18      | 57 39,100      | 58 2.99        | 59 85,700      |
| 60 Total adult population | 0.44         | 106,500        | 1.16           | 297,600        |

61  
62 From previous studies, we know that young men<sup>44</sup> and older people of both sexes are often under-  
63 represented populations<sup>41,42</sup>. They may be less likely to express an interest in taking part in studies<sup>41</sup>,  
64 or they may be excluded by the inclusion/exclusion criteria used<sup>42</sup>. In anticipation that some of these  
65 'hard to reach' groups may be under-represented in our sample, we propose to monitor the  
66 characteristics of participants who are enrolled in the study and apply stratified recruitment  
67 processes in later recruitment waves if required.  
68  
69  
70

### Data analysis plan

Analyses techniques used in descriptive epidemiology will address aim 1. Data will be presented as absolute numbers and percentages, presented for the whole group, and stratified by age (18-44; 45-64; 65-74; 75+), sex and level of socioeconomic deprivation (Index of Multiple Deprivation<sup>45</sup>, derived using participant postcodes and categorised as quartiles of most deprived, deprived, less deprived and least deprived).

Using structural equation modelling (SEM) and latent trajectory models (LTM) we will address the studies second aim: to examine if disrupted sleep patterns are associated with poor HRQoL.

SEM will assess whether the sleep and circadian rest/activity parameters measured at baseline mediate the association between RAPID3 score and HRQoL at 60 days (the end of the follow-up period) allowing inter-correlation between the sleep and circadian rest/activity parameters and adjusting for putative confounders. The SEM analysis will be repeated adding to the model pain, fatigue and mood to assess the effect of on HRQoL (for example Figure 5). Finally the analysis will be repeated including the data on mediators collected at day 30. This will allow assessment of whether RAPID3 predicts change in the mediating factors and the subsequent impact on HRQOL at day 60. An exploratory multi-group SEM analysis will assess the moderating effects of age and sex and will thus address the third aim of this study.

[Figure 5 here]

*Figure 5 – Hypothetical model of the pathways of relationship between rheumatoid arthritis and quality of life disease severity, sleep, fatigue, mood, and pain– simple model. In this figure rectangles represent observed variables, and circles represent the constructs those variables represent. Solid arrows represent the pathways to be tested. RAPID-3: Routine Assessment of Patient Index Data 3, CSD: Consensus Sleep Diary, PSQI: Pittsburgh Sleep Quality Index, AIMS2-SF: Arthritis Impact Measurement Scale 2 - Short Form.*

The SEM analysis assumes that the identified associations are consistent across participants, and uses only selected time points. Latent trajectory models will utilise all of the repeated measures data to fully explore the longitudinal relationships between RAPID3, mediators, and HRQoL, and their variation between participants. First, multilevel growth models, accounting for the clustering of repeated measures (level 1) within participants (level2), will assess the prospective associations of RAPID3 with key observed pathways from the SEM analysis, and the prospective associations with HRQoL. Second, we will assess if distinct clusters of participants can be identified with different

1  
2  
3 longitudinal courses using dual trajectory latent class growth analysis. We will assess how these  
4 trajectories are associated with change in HRQoL over 60 days and the socio-demographic and  
5 clinical characteristics associated with these different trajectories.  
6  
7

8 Finally, to estimate how successful treatments that improve sleep might be for people with RA, we  
9 will use the information obtained from the above methods to estimate the potential effect on  
10 HRQoL of a hypothetical successful intervention targeted at the key identified sleep disturbances,  
11 taking into account the proportion of variance in HRQoL explained and how common the sleep  
12 disturbance is in the population.  
13  
14  
15

### 16 **Ethics and dissemination:**

17  
18  
19 This study was underwent a full NHS Research Ethics Committee (REC) review and was allocated to  
20 the National Research Ethics Service (NRES) Committee North West – Liverpool Central REC. The  
21 study was approved by the NRES Committee North West – Liverpool Central REC on 12 April 2017,  
22 reference 17/NW/0217.  
23  
24  
25

26  
27 Results from this study will be disseminated at regional and international conferences and in peer-  
28 reviewed journals. Results will also be disseminated at Patient and Public Engagement (PPE) events  
29 where opportunities arise and are appropriate.  
30  
31

### 32 **Discussion:**

33  
34  
35 People with RA frequently report reduced HRQoL, which may be caused by sleep disturbances. Few  
36 studies have determined the relationship between sleep and quality of life among RA populations  
37 and those which have are laden with methodological challenges, which preclude accurate  
38 assessment and understanding of the relationship between sleep and HRQoL. The QUASAR study is a  
39 comprehensive study which has been designed to overcome these challenges. The results of this  
40 study will inform future intervention studies by answering key questions regarding the link between  
41 sleep and poor HRQoL.  
42  
43  
44  
45  
46  
47  
48  
49  
50  
51  
52  
53  
54  
55  
56  
57  
58  
59  
60

## Reference List

1. NICE. Rheumatoid Arthritis: National Clinical Guideline for Management and Treatment in Adults. Clinical guideline [CG79]. 2015. National Institute of Health and Clinical Excellence.
2. Symmons D, Turner G, Webb R, Asten P, Barrett E, Lunt M *et al*. The prevalence of rheumatoid arthritis in the United Kingdom: new estimates for a new century. *Rheumatology* 2002;**41**:793-800.
3. Verstappen SMM, Bijlsma JWJ, Verkleij H, Buskens E, Blaauw AAM, Ter Borg EJ *et al*. Overview of work disability in rheumatoid arthritis patients as observed in cross-sectional and longitudinal surveys. *Arthritis Care & Research* 2004;**51**:488-97.
4. Dominik K, Ahern F, Gold C, Heller D. Health-related quality of life among older adults with arthritis. *Health and quality of life outcomes* 2004;**2**:1-8.
5. Gerhold K, Richter A, Schneider M, Bergerhausen H, Demary W, Liebhaber A *et al*. Health-related quality of life in patients with long-standing rheumatoid arthritis in the era of biologics: data from the German biologics register RABBIT. *Rheumatology* 2015;**54**:1858-66.
6. Geryk L, Carpenter D, Blalock S, DeVillis R, Jordan J. The impact of co-morbidity on health-related quality of life in rheumatoid arthritis and osteoarthritis patients. *Clinical and experimental rheumatology* 2015;**33**:366-74.
7. Drewes AM, Svendsen L, Taagholt SJ, Bjerregard K, Nielsen KD, Hansen B. Sleep in rheumatoid arthritis: a comparison with healthy subjects and studies of sleep/wake interactions. *British Journal of Rheumatology* 1998;**37**:71-81.
8. Roehrs T, Diederichs C, Gillis M, Burger A, Stout R, Lumley M *et al*. Nocturnal sleep, daytime sleepiness and fatigue in fibromyalgia patients compared to rheumatoid arthritis patients and healthy controls: a preliminary study. *Sleep Medicine* 2013;**14**:109-15.
9. Crosby LJ. Factors which contribute to fatigue associated with rheumatoid arthritis. *Journal of advanced nursing* 1991;**16**:974-81.
10. Wolfe F, Walitt BT, Katz RS, Hauser W. Symptoms, the nature of fibromyalgia, and diagnostic and statistical manual 5 (DSM-5) defined mental illness in patients with rheumatoid arthritis and fibromyalgia. *PLoS One* 2014;**14**:e88740.
11. Lee YC, Chibnik LB, Lu B, Wasan AD, Edwards RR, Fossel AH *et al*. The relationship between disease activity, sleep, psychiatric distress and pain sensitivity in rheumatoid arthritis: a cross-sectional study. *Arthritis research & therapy* 2009;**11**:1-11.
12. Lautenbacher S, Kundermann B, Krieg J. Sleep deprivation and pain perception. *Sleep Medicine Reviews* 2006;**10**:357-69.
13. Goodchild CE, Treharne GJ, Booth DA, Bowman SJ. Daytime patterning of fatigue and its associations with the previous night's discomfort and poor sleep among women with primary Sjögren's syndrome or rheumatoid arthritis. *Musculoskeletal Care* 2010;**8**:107-17.

14. Irwin MR, Olmstead R, Carrillo C, Sadeghi N, Fitzgerald JD, Ranganath VK *et al.* Sleep loss exacerbates fatigue, depression, and pain in rheumatoid arthritis. *Sleep* 2012;**35**:537-43.
15. Sariyildiz MA, Batmaz I, Bozkurt M, Bez Y, Centincakmak MG, Yazmalar L *et al.* Sleep Quality in Rheumatoid Arthritis: Relationship Between the Disease Severity, Depression, Functional Status and the Quality of Life. *Journal of Clinical Medicine Research* 2014;**6**:44-52.
16. Purabdollah M, Lakdizaji S, Rahmani A, Hajalilu M, Ansarin K. Relationship between Sleep Disorders, Pain and Quality of Life in Patients with Rheumatoid Arthritis. *Journal of Caring Sciences* 2015;**4**:233-41.
17. Goes ACJ, Reis LAB, Silva MBG, Kahlow BS, Skare TL. Rheumatoid arthritis and sleep quality. *Revista Brasileira de Reumatologia (English Edition)* 2017;**57**:294-8.
18. Guo G, Fu T, Yin R, Zhang L, Zhang Q, Xia Y *et al.* Sleep quality in Chinese patients with rheumatoid arthritis: contributing factors and effects on health-related quality of life. *Health and quality of life outcomes* 2016;**14**:151.
19. Tafti M. Genetic aspects of normal and disturbed sleep . *Sleep Medicine* 2009;**10**:S17-S21.
20. Buysse DJ, Ancoli-Israel S, Edinger JD, Lichstein KL, Morin CM. Recommendations for a standard research assessment of insomnia. *Sleep: Journal of Sleep and Sleep Disorders Research* 2006;**29**:1155-73.
21. Buysse DJ. Sleep health: can we define it? Does it matter? *Sleep* 2014;**37**:9-17.
22. Muller S, Hider SL, Raza K, Stack RJ, Hayward RA, Mallen CD. An algorithm to identify rheumatoid arthritis in primary care: a Clinical Practice Research Datalink study. *BMJ open* 2015;**5**:e009309.
23. Anderson J, Caplan L, Yazdany J, Robbins ML, Neogi T, Michaud K *et al.* Rheumatoid arthritis disease activity measures: American College of Rheumatology recommendations for use in clinical practice. *Arthritis Care & Research* 2012;**64**:640-7.
24. Espie CA, Kyle SD, Hames P, Gardani M, Fleming L, Cape J. The Sleep Condition Indicator: a clinical screening tool to evaluate insomnia disorder. *BMJ open* 2014;**4**:e004183.
25. Scott DL, Garrood T. Quality of life measures: use and abuse. *Bailliere's Clinical Rheumatology* 2000;**14**:663-87.
26. World Health Organisation. Programme on Mental Health: WHOQOL user manual. 2012.
27. Gignac MAM, Cao X, McAlpine J, Badley EM. Arthritis Impact Measurement Scales 2 (AIMS2), Arthritis Impact Measurement Scales 2-Short Form (AIMS2-SF), The Organization for Economic Cooperation and Development (OECD) Long-Term Disability (LTD) Questionnaire, EQ-5D, World Health Organization Disability Assessment Schedule II (WHODASII), Late-Life Function and Disability Instrument (LLFDI), and Late-Life Function and Disability Instrument-Abbreviated Version (LLFDI-Abbreviated) Measures of Disability. *Arthritis Care & Research* 2011;**63**:S308-S324.
28. Mollayeva T, Thurairajah P, Burton K, Mollayeva S, Shapiro CM, Colantonio S. The Pittsburgh sleep quality index as a screening tool for sleep dysfunction in clinical and non-clinical samples: A systematic review and meta-analysis. *Sleep Medicine Reviews* 2016;**25**:52-73.



- 1
  - 2
  - 3
  - 4
  - 5
  - 6
  - 7
  - 8
  - 9
  - 10
  - 11
  - 12
  - 13
  - 14
  - 15
  - 16
  - 17
  - 18
  - 19
  - 20
  - 21
  - 22
  - 23
  - 24
  - 25
  - 26
  - 27
  - 28
  - 29
  - 30
  - 31
  - 32
  - 33
  - 34
  - 35
  - 36
  - 37
  - 38
  - 39
  - 40
  - 41
  - 42
  - 43
  - 44
  - 45
  - 46
  - 47
  - 48
  - 49
  - 50
  - 51
  - 52
  - 53
  - 54
  - 55
  - 56
  - 57
  - 58
  - 59
  - 60
29. Buysse DJ, Reynolds CF, Monk TH, Berman SR, Kupfer DJ. The Pittsburgh Sleep Quality Index: a new instrument for psychiatric practice and research. *Psychiatry research* 1989;**28**:193-213.
30. Morin CM, Vallieres A, Ivers H. Dysfunctional beliefs and attitudes about sleep (DBAS): validation of a brief version (DBAS-16). *Sleep* 2007;**30**:1547.
31. Herrmann C. International experiences with the Hospital Anxiety and Depression Scale—a review of validation data and clinical results. *Journal of psychosomatic research* 1997;**42**:17-41.
32. Brady TJ. Measures of self-efficacy: Arthritis Self-Efficacy Scale (ASES), Arthritis Self-Efficacy Scale-8 Item (ASES-8), Children's Arthritis Self-Efficacy Scale (CASE), Chronic Disease Self-Efficacy Scale (CDESES), Parent's Arthritis Self-Efficacy Scale (PASE), and Rheumatoid Arthritis Self-Efficacy Scale (RASE). *Arthritis Care & Research* 2011;**63**:S473-S485.
33. McCracken LM, Chilcot J, Norton S. Further development in the assessment of psychological flexibility: a shortened Committed Action Questionnaire (CAQ-8). *European journal of pain* 2015;**19**:677-85.
34. Sadaka Y, Sadeh A, Bradbury L, Massicotte C, Zak M, Go C *et al*. Validation of actigraphy with continuous video-electroencephalography in children with epilepsy. *Sleep Medicine* 2014;**15**:1075-81.
35. Falck RD, Landry GJ, Brazendale K, Liu-Ambrose T. Measuring Physical Activity in Older Adults Using MotionWatch 8 Actigraphy: How Many Days are Needed? *Journal of Aging and Physical Activity* 2017;**25**:51-7.
36. Landry GJ, Best JR, Liu-Ambrose T. Measuring sleep quality in older adults: a comparison using subjective and objective methods. *Frontiers in Aging Neuroscience* 2015;**7**:166.
37. Elbaz M, Yaou K, Metlaine A, Martoni M, Leger D. Validation of a new actigraph motion watch versus polysomnography on 70 healthy and suspected sleep-disordered subjects. *Journal of Sleep Research* 2012;**21**:218.
38. Short V, McBeth J, Druce KL, Moore S, Dixon WG, Kyle SD *et al*. Fluctuating, unpredictable and challenging: how pain, fatigue and sleep disturbance impact on quality of life in people with rheumatoid arthritis. *Annals of the rheumatic diseases* 2017;**76**.
39. Maich KH, Lachowski AM, Carney CE. Psychometric Properties of the Consensus Sleep Diary in Those With Insomnia Disorder. *Behavioral sleep medicine* 2016;**1**-18.
40. Carney CE, Buysse DJ, Ancoli-Israel S, Edinger JD, Krystal AD, Lichstein KL *et al*. The Consensus Sleep Diary: Standardizing Prospective Sleep Self-Monitoring. *Sleep* 2012;**35**:287-302.
41. Westland JC. Lower bounds on sample size in structural equation modeling. *Electronic Commerce Research and Applications* 2010;**9**:476-87.
42. Soper, D. S. A-priori Sample Size Calculator for Structural Equation Models (Online Software). 2012.

- 1
- 2
- 3 43. Curran PJ, Obeidat K, Losardo D. Twelve Frequently Asked Questions About Growth Curve
- 4 Modeling. *Journal of Cognition and Development* 2010;**11**:121-36.
- 5
- 6 44. Druce KL, McBeth J, van der Veer SN, Selby DA, Vidgen B, Georgatzis K *et al.* Recruitment and
- 7 ongoing engagement in a UK smartphone study examining the association between weather
- 8 and pain . *JMIR* 2017;**5**:e168.
- 9
- 10 45. Department of the Environment, Transport and the regions. Indices of deprivation 2000.
- 11 2000.
- 12
- 13
- 14
- 15
- 16
- 17
- 18
- 19
- 20
- 21
- 22
- 23
- 24
- 25
- 26
- 27
- 28
- 29
- 30
- 31
- 32
- 33
- 34
- 35
- 36
- 37
- 38
- 39
- 40
- 41
- 42
- 43
- 44
- 45
- 46
- 47
- 48
- 49
- 50
- 51
- 52
- 53
- 54
- 55
- 56
- 57
- 58
- 59
- 60

For peer review only

1  
2  
3 Authors contributions:

4 JM led the conception and design of the study.

5 KLD, LC, VS, SM, BH, BJ, ML, DSK, WGD and JM made substantial contributions to the conception and  
6 design of the study.

7 JM and ML planned the statistical analysis.

8 KLD wrote the first draft of the protocol manuscript.

9 LC, VS, SM, BH, BJ, ML, DSK, WGD and JM critically reviewed the protocol manuscript.

10 KLD, LC, VS, SM, BH, BJ, ML, DSK, WGD and JM approved the final version of the document.  
11  
12  
13

14 Data sharing statement: We intend to make data available for data sharing after the data collection  
15 has been completed and the primary aims of the study are met.  
16  
17

18 Funding statement: This study is supported by Arthritis Research UK grant number 21188. The study  
19 is also supported by infrastructure support from the Arthritis Research UK Centre for Epidemiology  
20 (grant reference 20380).  
21  
22  
23

24 Competing interests statement: The authors have no competing interests to disclose  
25  
26  
27  
28  
29  
30  
31  
32  
33  
34  
35  
36  
37  
38  
39  
40  
41  
42  
43  
44  
45  
46  
47  
48  
49  
50  
51  
52  
53  
54  
55  
56  
57  
58  
59  
60

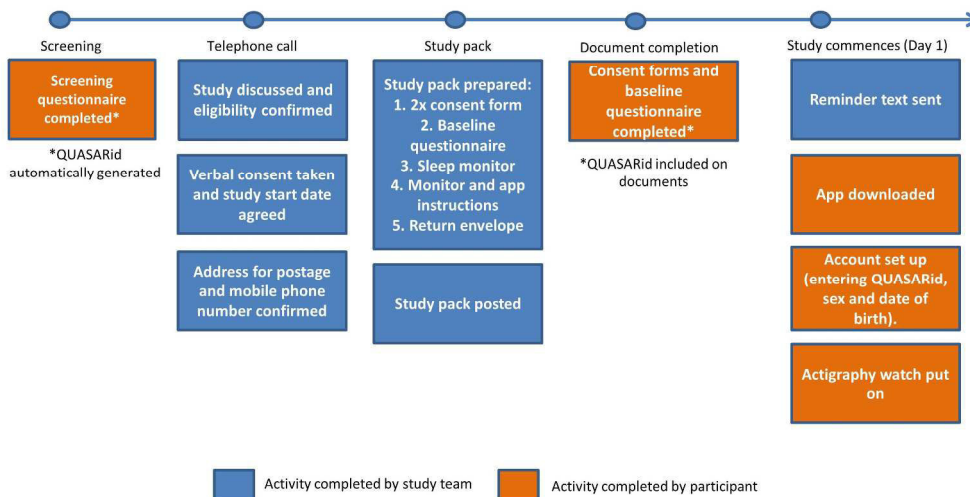

Figure 1 – Flow of participant entry into the study

254x190mm (300 x 300 DPI)

1  
2  
3  
4  
5  
6  
7  
8  
9  
10  
11  
12  
13  
14  
15  
16  
17  
18  
19  
20  
21  
22  
23  
24  
25  
26  
27  
28  
29  
30  
31  
32  
33  
34  
35  
36  
37  
38  
39  
40  
41  
42  
43  
44  
45  
46  
47  
48  
49  
50  
51  
52  
53  
54  
55  
56  
57  
58  
59  
60

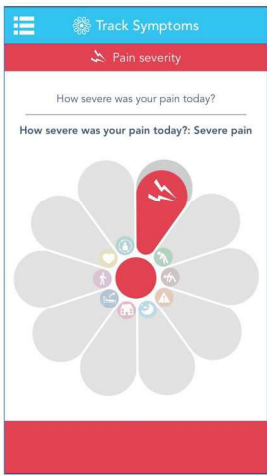

Figure 2 - Screenshot of uMotif study app

254x190mm (300 x 300 DPI)

View only

1  
2  
3  
4  
5  
6  
7  
8  
9  
10  
11  
12  
13  
14  
15  
16  
17  
18  
19  
20  
21  
22  
23  
24  
25  
26  
27  
28  
29  
30  
31  
32  
33  
34  
35  
36  
37  
38  
39  
40  
41  
42  
43  
44  
45  
46  
47  
48  
49  
50  
51  
52  
53  
54  
55  
56  
57  
58  
59  
60

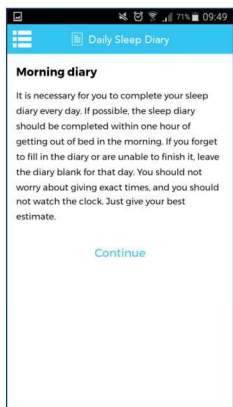

Figure 3 – Screenshot of consensus sleep diary within study app

254x190mm (300 x 300 DPI)

Peer Review Only



Figure 4 - Data collection and participant contact across 60 days for participants enrolled in QUASAR

254x190mm (300 x 300 DPI)



Figure 5 – Hypothetical model of the pathways of relationship between rheumatoid arthritis and quality of life disease severity, sleep, fatigue, mood, and pain– simple model. In this figure rectangles represent observed variables, and circles represent the constructs those variables represent. Solid arrows represent the pathways to be tested. RAPID-3: Routine Assessment of Patient Index Data 3, CSD: Consensus Sleep Diary, PSQI: Pittsburgh Sleep Quality Index, AIMS2-SF: Arthritis Impact Measurement Scale 2 - Short Form.

254x190mm (300 x 300 DPI)

only



# BMJ Open

## Quality of life, sleep and rheumatoid arthritis (QUASAR): A protocol for a prospective UK mHealth study to investigate the relationship between sleep and quality of life in adults with rheumatoid arthritis

|                                 |                                                                                                                                                                                                                                                                                                                                                                                                                                                                                                                                                                                                                                                                                                                                                                                                                                                                                                                                                                                                                                                                                    |
|---------------------------------|------------------------------------------------------------------------------------------------------------------------------------------------------------------------------------------------------------------------------------------------------------------------------------------------------------------------------------------------------------------------------------------------------------------------------------------------------------------------------------------------------------------------------------------------------------------------------------------------------------------------------------------------------------------------------------------------------------------------------------------------------------------------------------------------------------------------------------------------------------------------------------------------------------------------------------------------------------------------------------------------------------------------------------------------------------------------------------|
| Journal:                        | <i>BMJ Open</i>                                                                                                                                                                                                                                                                                                                                                                                                                                                                                                                                                                                                                                                                                                                                                                                                                                                                                                                                                                                                                                                                    |
| Manuscript ID                   | bmjopen-2017-018752.R2                                                                                                                                                                                                                                                                                                                                                                                                                                                                                                                                                                                                                                                                                                                                                                                                                                                                                                                                                                                                                                                             |
| Article Type:                   | Protocol                                                                                                                                                                                                                                                                                                                                                                                                                                                                                                                                                                                                                                                                                                                                                                                                                                                                                                                                                                                                                                                                           |
| Date Submitted by the Author:   | 11-Dec-2017                                                                                                                                                                                                                                                                                                                                                                                                                                                                                                                                                                                                                                                                                                                                                                                                                                                                                                                                                                                                                                                                        |
| Complete List of Authors:       | Druce, Katie; University of Manchester, Arthritis Research UK Centre for Epidemiology<br>Cordingley, Lis; Manchester University, Division of Musculoskeletal and Dermatological Sciences<br>Short, Vicky; University of Manchester, Arthritis Research UK Centre for Epidemiology<br>Moore, Susan; University of Manchester, Arthritis Research UK Centre for Epidemiology<br>Hellman, Bruce; uMotif<br>James, Ben; uMotif<br>Lunt, Mark; University of Manchester, Arthritis Research UK Centre for Epidemiology<br>Kyle, Simon; University of Oxford, Sleep and Circadian Neuroscience Institute, Nuffield Department of Clinical Neurosciences<br>Dixon, Will; University of Manchester, Arthritis Research UK Centre for Epidemiology; NIHR Manchester Musculoskeletal Biomedical Research Unit, Central Manchester University Hospitals NHS Foundation Trust<br>McBeth, John; University of Manchester, Arthritis Research UK Centre for Epidemiology; NIHR Manchester Musculoskeletal Biomedical Research Unit, Central Manchester University Hospitals NHS Foundation Trust |
| <b>Primary Subject Heading</b>: | Epidemiology                                                                                                                                                                                                                                                                                                                                                                                                                                                                                                                                                                                                                                                                                                                                                                                                                                                                                                                                                                                                                                                                       |
| Secondary Subject Heading:      | Rheumatology                                                                                                                                                                                                                                                                                                                                                                                                                                                                                                                                                                                                                                                                                                                                                                                                                                                                                                                                                                                                                                                                       |
| Keywords:                       | SLEEP MEDICINE, RHEUMATOLOGY, EPIDEMIOLOGY                                                                                                                                                                                                                                                                                                                                                                                                                                                                                                                                                                                                                                                                                                                                                                                                                                                                                                                                                                                                                                         |
|                                 |                                                                                                                                                                                                                                                                                                                                                                                                                                                                                                                                                                                                                                                                                                                                                                                                                                                                                                                                                                                                                                                                                    |

SCHOLARONE™  
Manuscripts

1  
2  
3 Quality of life, sleep and rheumatoid arthritis (QUASAR): A protocol for a prospective UK mHealth  
4 study to investigate the relationship between sleep and quality of life in adults with rheumatoid  
5 arthritis  
6  
7

8 Druce KL<sup>1\*</sup>, Cordingley L<sup>2</sup>, Short V<sup>1</sup>, Moore S<sup>1</sup>, Hellman B<sup>3</sup>, James B<sup>3</sup>, Lunt M<sup>1</sup>, Kyle S.D.<sup>4</sup>, Dixon WG<sup>1,5</sup>,  
9 McBeth J<sup>1,5</sup>  
10

11  
12 <sup>1</sup> Arthritis Research UK Centre for Epidemiology, University of Manchester, Manchester, UK.  
13

14  
15 <sup>2</sup> Division of Musculoskeletal and Dermatological Sciences, University of Manchester, Manchester UK  
16

17  
18 <sup>3</sup> uMotif, London, UK  
19

20  
21 <sup>4</sup> Sleep and Circadian Neuroscience Institute, Nuffield Department of Clinical Neurosciences.  
22 University of Oxford, Oxford, UK.  
23

24  
25 <sup>5</sup> NIHR Manchester Musculoskeletal Biomedical Research Centre, Central Manchester University  
26 Hospitals NHS Foundation Trust, Manchester, UK.  
27

28  
29 \*corresponding author:

30  
31 Katie Druce

32  
33 katie.druce@manchester.ac.uk; Arthritis Research UK Centre for Epidemiology, University of  
34 Manchester, Stopford Building, Oxford Road, Manchester, M13 9PT.  
35  
36  
37  
38  
39  
40  
41  
42  
43  
44  
45  
46  
47  
48  
49  
50  
51  
52  
53  
54  
55  
56  
57  
58  
59  
60

## Abstract

Introduction: People with rheumatoid arthritis (RA) frequently report reduced health-related quality of life (HRQoL), the impact one's health has on physical, emotional and social well-being. There are likely numerous causes for poor HRQoL, but people with RA have identified sleep disturbances as a key contributor to their well-being. This study will identify sleep/wake rhythm-associated parameters that predict HRQoL in patients with RA.

Methods and analysis: This prospective cohort study will recruit 350 people with RA, aged 18 years or older. Following completion of a paper-based baseline questionnaire, participants will record data on 10 symptoms including pain, fatigue, and mood twice-daily for 30 days using a study-specific mobile application (app). A tri-axial accelerometer will continuously record daytime activity and estimate evening sleep parameters over the 30 days. Every 10 days following study initiation participants will complete a questionnaire that measures disease specific (Arthritis Impact Measurement Scale 2 - Short Form (AIMS2-SF)) and generic (WHOQOL-BREF) quality of life. A final questionnaire will be completed at 60 days after entering the study. The primary outcomes are the AIMS2-SF and WHOQOL-BREF. Structural equation modelling (SEM) and latent trajectory models (LTM) will be used to examine the relationship between sleep/wake rhythm-associated parameters and HRQoL, over time.

Ethics and dissemination: Ethical approval for this study has been obtained from the National Research Ethics Service (REC ref: 17/NW/0217). Results from this study will be disseminated at regional and international conferences, in peer-reviewed journals and Patient and Public Engagement (PPE) events, as appropriate.

### Strengths and limitations of this study

1. This study will take advantage of advances in mobile health (mhealth) to embed data collection into the daily lives of participants.
2. Using a patient co-designed smartphone/tablet app it will capture objective and subjective sleep as well as self-reported symptoms.
3. Sophisticated structural equation modelling (SEM) and latent trajectory models (LTM) will enable the study to disentangle the complex relationship between sleep, HRQoL and other symptoms.
4. While the use of actigraphy allows the collection of objective sleep data, it is not able to inform investigation of the relationship between HRQoL and sleep architectural parameters or sleep oscillations (e.g., spindles, slow waves).

1  
2  
3 5. Potential sources of bias include a) sampling bias, if those recruited to this study are only those  
4 who experience sleep disturbances and/or are comfortable/familiar with using smartphone apps and  
5 activity monitors, and b) loss to follow-up bias if those who do not complete the full data collection  
6 protocol are systematically different from those who do.  
7

## 8 **Introduction**

9

10 Quality of life, sleep and rheumatoid arthritis (QUASAR) is a prospective cohort study which will use  
11 a patient designed smartphone/tablet app and accelerometer to collect information on sleep and  
12 health-related quality of life (HRQoL) in rheumatoid arthritis (RA).  
13  
14

15  
16 RA is a common chronic inflammatory disease characterised by joint damage, pain and disability.<sup>1</sup>  
17 The occurrence of RA is between two and four times greater in women and as many as 70% of men  
18 and women of working age with RA stop work within 10-15 years of disease duration due to the  
19 condition.<sup>2;3</sup> People with RA frequently report reduced HRQoL, which can be characterised as the  
20 impact one's health has on physical, emotional and social well-being. People with RA have poorer  
21 HRQoL when compared to those with other rheumatic diseases<sup>4</sup> or healthy peers.<sup>5;6</sup> Poor HRQoL  
22 may even persist when the disease is well controlled.<sup>5</sup>  
23  
24  
25  
26  
27

28 Although there are likely numerous causes for poor HRQoL, people with RA have identified sleep  
29 disturbances as a key contributor to their well-being.<sup>7-9</sup> It is well known that people with RA report  
30 substantial sleep disturbances,<sup>10;11</sup> such as less total sleeping time and unrefreshing sleep<sup>8</sup> and  
31 greater night time awakenings.<sup>7;9</sup> The cyclical nature of relationships between sleep disruptions and  
32 symptoms such as pain, fatigue and disability is relatively well characterised and likely cyclical.<sup>12-</sup>  
33  
34  
35  
36  
37  
38  
39  
40  
41  
42  
43  
44  
45  
46  
47  
48  
49  
50  
51  
52  
53  
54  
55  
56  
57  
58  
59  
60  
<sup>14</sup>However, few studies have determined the relationship between sleep and quality of life among  
RA populations.

Studies which have investigated the relationship between sleep and HRQoL have tended to suggest  
that sleep problems are associated with poor HRQoL.<sup>15-18</sup> However, these studies have been of low  
quality and have been hampered by a number of methodological challenges, which preclude  
accurate assessment and understanding of the relationship between sleep and HRQoL. First and  
foremost, sleep is a multifaceted behaviour which comprises objective and subjective components.<sup>19</sup>  
Despite guidelines endorsing the measurement of both and the potential for discrepancy between  
subjective and objective reports,<sup>20</sup> it is only subjective sleep which has been commonly measured  
within epidemiological studies because, historically, it has been difficult to objectively measure sleep  
outside of artificial laboratory settings. Studies have also tended to be cross-sectional in design or to  
have used low-resolution longitudinal data collection protocols which have not been able to collect  
data regarding the recurrent and fluctuating day to day changes in sleep and associated symptoms.

1  
2  
3 Now, advances in the availability of smartphone apps and wearables for health monitoring provide a  
4 hitherto unobtainable mechanism to collect regular self-reported symptoms and objective sleep  
5 data, while embedding data collection into participants' everyday lives. This study will use a  
6 combination of patient co-designed smartphone/tablet app (provided by uMotif, London, UK) and a  
7 tri-axial accelerometer (MotionWatch8, CamNtech, Cambridge, UK) to capture both subjective and  
8 objective assessments of sleep quality, continuity and duration, as well as the timing and stability of  
9 the periods of time when someone is asleep or active.<sup>21</sup> Furthermore, the uMotif app will be used to  
10 collect information about self-reported symptoms which were identified as priorities by patients in a  
11 series of focus groups and patient involvement activities. In doing so this study aims to identify the  
12 relationship between sleep parameters, aspects of the sleep/wake rhythm-associated parameters,  
13 and HRQoL in people with RA.  
14  
15  
16  
17  
18  
19  
20  
21  
22  
23  
24

#### 25 Study objectives

- 26 1. Describe baseline and period distribution of sleep/wake rhythm-associated parameters  
27 stratified by age, sex, socioeconomic status, and disease characteristics.  
28
- 29 2. Determine relative contributions of sleep/wake rhythm-associated parameters, pain,  
30 fatigue and mood to RA-HRQoL.  
31
- 32 3. In an exploratory analysis to examine whether the relationship between disease severity,  
33 sleep/wake rhythm-associated parameters, pain, fatigue, mood and RA-HRQoL are  
34 moderated by age and sex.  
35
- 36 4. Estimate the potential effect on RA-HRQoL of a successful intervention targeted at the  
37 key identified pathway(s).  
38  
39  
40  
41  
42  
43

#### 44 Experimental design and methods

#### 45 **Methods and analysis:**

#### 46 **Study design**

47  
48 We will conduct a prospective cohort study to investigate the relationships between sleep and  
49 HRQoL in people with RA.  
50  
51  
52  
53  
54  
55  
56  
57

### *Identifying and recruiting potential participants*

Participants will be recruited via three channels. The primary source for participants will be the National Rheumatoid Arthritis Society (NRAS). NRAS is a national patient organisation with over 7000 members. Emails advertising the study will be sent to NRAS mailing list members and will include a copy of the study information pack comprising:

1. Study poster
2. Participant information sheet
3. Copy of the consent form (for information only)
4. A link to complete an online screening questionnaire

Following approval from the Health Research Authority (HRA) and via arrangements with Clinical Commissioning Groups (CCGs), participants will also be recruited via NHS mailing lists, where such mailing lists are available. NHS mailing lists provide the opportunity to search General Practitioner (GP) records for potentially eligible participants. Local Clinical Research Network (CRN) teams will search GP records for patients aged 18 or older, with a diagnosis of RA and who are in receipt of a Disease Modifying Anti-rheumatic Drug (DMARD), as recommended by Muller et al.<sup>22</sup> Letters will be sent to the identified patients, provided the GP or clinical team in the practice confirms that approaching the patient is acceptable. Reasons for not approaching patients may include previous refusal for records to be used for research, current hospitalisation, or belief that the participant is not capable of participation. Within the letter, participants will be briefly introduced to the study and persons interested in participating will be asked to email the study team directly for the study information pack, the contents of which are detailed above.

Information about the study will be displayed on the NIHR Clinical Research Network Portfolio to encourage NHS sites to support study recruitment by displaying posters advertising the study in any NHS Rheumatology clinics. NHS sites interested in supporting the study will contact the study team directly for further information and all relevant documentation needed to confirm they have the capacity and capability required to support the study. The displayed posters will provide brief information about the study and will ask persons interested in participating to email the study team directly for the study information pack, the contents of which are detailed above.

Following the receipt of the study information pack, potential participants follow an identical recruitment strategy (**Error! Reference source not found.**).

1  
2  
3  
4 [Figure 1 here]  
5  
6  
7

### 8 ***Screening questionnaire***

9  
10 Persons who receive the study information pack and are interested in participating in the study will  
11 be asked to complete the study screening questionnaire. Potential participants are asked to record  
12 their sex and date of birth, and to confirm whether they a) have a diagnosis of RA (including date of  
13 diagnosis), b) are currently using DMARDs (biologic or conventional synthetic), c) have access to an  
14 Android or Apple smartphone or tablet. For the purposes of exclusion criteria, interested persons  
15 must also indicate whether they are currently employed in shift work. Finally, potential participants  
16 will be asked to give consent and contact details and preferred contact time (9am to 12 noon, 12  
17 noon to 3pm, 3pm to 6pm or 6pm to 8pm) to enable the study team to contact them to discuss  
18 participation in the study.  
19  
20  
21  
22  
23

### 24 ***Eligibility criteria***

25  
26 Screening questionnaire respondents will be considered eligible for the study if they:

- 27 • Are aged  $\geq 18$  years
  - 28 • Have a diagnosis of rheumatoid arthritis
  - 29 • Are currently using DMARDs (biologic or conventional synthetic)
  - 30 • Have access to an Android or Apple smartphone or tablet
- 31  
32  
33  
34

35 Respondents would be excluded from the study if they:

- 36 • Are currently employed in a job that requires shift work
- 37  
38  
39

### 40 ***QUASARid***

41  
42 Study participants will be asked to provide data via three different platforms: paper-based  
43 questionnaires, a study app (downloaded onto a smartphone or tablet), and a tri-axial accelerometer  
44 that will measure daytime physical activity and sleep. To ensure that the data collected across these  
45 platforms can be consistently and accurately linked and matched to each participant, a unique  
46 participant identifier will be generated for each participant. The unique identifier, known as a  
47 QUASARid, will be automatically generated as the unique survey response which is allocated to the  
48 participant when they commence the screening questionnaire.  
49  
50  
51  
52  
53

### 54 ***Telephone call***

Potential participants meeting the study inclusion criteria will be telephoned by a member of the study team. To ensure they have had adequate time to review the participant information sheet provided in the study information email, telephone calls will take place no earlier than 24 hours after receipt of a completed screening questionnaire. A total of four attempts to contact the potential participant will be made on consecutive week days. During the phone call a verbal summary of the information sheet will be discussed with the potential participant and they will be given the opportunity to ask as many questions about the study as they wish.

#### ***Verbal consent and agreement of study start date***

Following the verbal summary of the study information sheet, participants will be given the option to enrol into the study, delay participation, request more time to think about participation or decline to take part in the study. Written consent will subsequently be obtained by the completion of two paper copies of the consent form sent to participants within the study pack. The provided consent forms will be signed and dated by the team member responsible for recruitment at the point of obtaining verbal consent, with participants asked to complete their own signature at the time of completing the baseline questionnaire. One copy of the consent form will be returned by the participant at the end of their first 30 days in QUASAR, along with the actigraph watch and baseline questionnaire. The second copy is for the patients' personal records.

Once verbal consent has been obtained participants will be asked to agree to a study start date, which should be within 14 days of the telephone call taking place. Participants who are unable to commence the study within 14 days will be asked to delay entry into the study. Those who agree a study start date will be asked to confirm their preferred postal address to which the study packs will be sent and a mobile phone number. The mobile phone number will be used to send participants text messages on the agreed study start date and throughout the study to encourage data completion and study compliance.

#### ***Study pack***

The provision of verbal consent also enables the study pack to be prepared and posted to participants in advance of the agreed study start date. The study pack will include a letter of introduction, two copies of the consent form and a paper copy of the baseline questionnaire. Participants will also be provided with instructions to download and use the study app, as well as an actigraph watch, called a MotionWatch8 (CamNtech, Cambridge, UK) and associated instructions.



1  
2  
3 The study pack will be sent from the University of Manchester using Special Delivery Guaranteed® to  
4 arrive no less than one day prior to the study start date.  
5  
6

### 7 ***Document completion – Consent form and baseline questionnaire***

8  
9  
10 Participants are requested to complete paper copies of the consent form and baseline questionnaire  
11 (sent within the study pack) on or before the first day of symptom monitoring. Initially, the baseline  
12 questionnaire was incorporated into the study app to be completed as part of the on-boarding  
13 process. However, due to limits on the number of questions which could be displayed per screen  
14 and the associated time required for data completion, app testing with the study team and members  
15 of a focus group indicated that this method of delivery would be less acceptable to participants than  
16 a paper based document.  
17

18 The participant's QUASARid will be written onto both the consent form and covering page of the  
19 baseline questionnaire to enable data linkage between these documents, the study app and  
20 actigraph watch. To encourage completion of the questionnaire in advance of the monitoring period,  
21 participants will be asked to indicate the date on which they have completed the questionnaire on  
22 the covering page. They will return the baseline questionnaire along with the monitor at the end of  
23 the study.  
24

25 The baseline questionnaire will comprise three sections: Demographic information, information  
26 about RA and health status information.  
27

#### 28 **Demographics**

29 Participants will record a number of demographic variables: sex, date of birth, weight and height,  
30 ethnicity, age left education, average weekly alcohol consumption, smoking status, occupational  
31 status, marital status and postcode. Participants will also indicate how likely they believe it is that  
32 sleep affects their quality of life and the impact that RA has on their work productivity. A description  
33 of the reporting of these items is shown in Table 1.  
34

#### 35 **Information about RA**

##### 36 ***Disease activity***

37 Participants will record the month and year of their diagnosis. Disease activity will be assessed using  
38 the Routine Assessment of Patient Index Data 3 (RAPID-3). The 15 item RAPID-3 is free to use and  
39

1  
2  
3 has been validated in RA populations. The measure has good validity and acceptable reliability and  
4 responsiveness.<sup>23</sup>  
5

6  
7 The RAPID-3 measures 3 domains: physical function (13 discrete response items), pain (1 item 0-10  
8 numerical rating scale (NRS)) and global health (1 item 0-10 NRS)) in the past week. The first 10  
9 items of the physical function domain are scored, transformed into a 0.3-10 scale and summed with  
10 the pain and global health domains to produce an overall score of 0-30. These overall scores are  
11 then converted into a weighed RAPID 3 score and categorised within the following disease activity  
12 score categories: Near remission (0.3-1.0), Low Severity (1.3-2.0), Moderate severity (2.3-4.0), High  
13 severity (4.3-10).  
14  
15  
16  
17

#### 18 19 *Co-morbid rheumatic disease(s) and sleep-related problem(s), and menopausal status*

  
20

21  
22 Participants will be asked to record the presence of a variety of other rheumatic diseases, co-  
23 morbidities which may affect sleep (e.g. Sjögren's syndrome, diabetes, multiple sclerosis,  
24 hypertension (Table 1)) and menopausal status.  
25

26  
27 For pragmatic reasons it was not possible to embed specific questionnaires about the presence,  
28 severity or impact of sleep disorders, as it was necessary to balance the availability of data with  
29 minimal participant burden of data completion. Nevertheless, because the presence of such  
30 disorders represent important co-variables which should be adjusted for within data analysis,  
31 participants will be asked to record whether they experience restless leg syndrome and obstructive  
32 sleep apnoea/snoring, A full list of co-morbidities collected is shown in Table 1.  
33  
34  
35  
36  
37

38  
39 Insomnia is recorded using the Sleep Condition Indicator (SCI), an 8 item questionnaire which has  
40 good concurrent validity, high internal consistency and is sensitive to change.<sup>24</sup> The SCI performs  
41 well to detect possible insomnia disorder and is the only validated and widely used insomnia  
42 measure that indexes insomnia disorder against contemporary criteria (e.g. International  
43 Classification of Sleep Disorders (ICSD-3); The Diagnostic and Statistical Manual of Mental Disorders  
44 (DSM-5)).<sup>24</sup>  
45  
46  
47

#### 48 49 *Medications*

  
50

51  
52 Participants will also be asked to record the use of medications including analgesics (e.g.  
53 Paracetamol, Nonsteroidal anti-inflammatories (NSAIDs) and opiates and disease modifying anti-  
54 rheumatic drugs (DMARDs, e.g. glucocorticoids, biologic DMARDs). The use of sleep medications,  
55 including sedatives or hypnotics, mood stabilisers, antidepressants, other sleep medications (e.g.  
56  
57  
58  
59  
60

1  
2  
3 Chlorpromazine, Haloperidol) will also be collected and participants will be given a free-text box to  
4 record other medications or coping strategies they use and the purpose for using the strategy (Table  
5 1).  
6  
7  
8  
9

### 10 *Quality of life (QoL)*

11  
12  
13 As is recommended,<sup>25</sup> participants will complete a generic and disease specific measure of HRQoL.  
14 Generic HRQoL will be reported using the WHOQOL-BREF, a 26 item instrument which measures 6  
15 domains in the past 14 days: overall perception of HRQoL (1 discrete response item), health (1  
16 discrete response item), physical (7 discrete response items), psychological (6 discrete response  
17 items), social relationships (3 discrete response items) and environment (8 discrete response items).  
18 The items from each domain are summed and transformed into a 0-100 score, where higher scores  
19 indicate better HRQoL.<sup>26</sup> The WHOQOL-BREF has good internal consistency, discriminant validity (i.e.  
20 discriminating ill versus well groups) and sensitivity to change.<sup>26</sup>  
21  
22  
23  
24  
25

26  
27 Disease specific HRQoL will be reported using the 26 item Arthritis Impact Measurement Scale 2  
28 (Short Form) (AIMS-2 SF). The AIMS-2 SF uses discrete response items to capture 5 domains within a  
29 4 week recall period: physical (13 items), symptom (3 items), affect (4 items), social interaction (4  
30 items) and role (2 items). After some items are reverse coded, domain items are summed and  
31 converted into a 0-10 scale, where higher scores indicate poorer HRQoL.<sup>27</sup> The AIMS-2 SF shows  
32 good internal consistency and acceptable construct validity. The scale also generally demonstrates  
33 promising evidence of sensitivity to change, but there is less evidence supporting this for social  
34 interaction and role subscales.<sup>27</sup>  
35  
36  
37  
38  
39

40 Participants will also be asked to use a free text box to indicate the top 3 things which are most  
41 important to them to ensure they have good quality of life.  
42  
43

### 44 *Sleep quality and beliefs about sleep*

45  
46  
47 Sleep quality in the past month will be measured using the Pittsburgh Sleep Quality Index (PSQI), the  
48 most widely used measure within clinical and research settings.<sup>28</sup> The 18 item instrument comprises  
49 7 domains: sleep quality (1 discrete response item), sleep latency (1 free-text item; 1 discrete  
50 response item), sleep duration (1 free-text item), sleep efficiency (2 free-text items), sleep  
51 disturbances (9 discrete response items), sleep medications (1 discrete response item), daytime  
52  
53  
54  
55  
56  
57

1  
2  
3 dysfunction (2 discrete response items). The PSQI has good reliability and validity<sup>28</sup> and  
4 demonstrates good sensitivity and specificity to distinguish good and poor sleepers.<sup>29</sup>  
5

6  
7 Participants will also record information regarding their beliefs about sleep using the 16 item  
8 Dysfunctional Beliefs and Attitudes about Sleep instrument (DBAS-16). Beliefs about causes,  
9 consequences, and treatment of sleep problems are rated on 11-point Likert scales ranging from 0  
10 (strongly disagree) to 10 (strongly agree). Scores are summed and averaged to produce a mean item  
11 score where higher scores indicate stronger endorsement of maladaptive beliefs about sleep.<sup>30</sup> The  
12 DBAS-16 has good internal consistency and test-retest reliability.<sup>30</sup>  
13  
14  
15

### 16 17 *Mood, self-efficacy and cognitive flexibility* 18

19  
20 Finally, mood, self-efficacy and cognitive flexibility will be measured as important co-variables which  
21 may affect the relationship between sleep and HRQoL. Mood, specifically anxiety and depression,  
22 will be measured using the 14 item Hospital Anxiety and Depression Scale (HADS).<sup>31</sup> Anxiety (7 items)  
23 and depression (7 items) in the preceding week are reported using discrete response questions,  
24 scored 0-3). Subscale items are summed to produce a score of 0-21, where higher scores represent  
25 poorer mood.<sup>31</sup> Scores tend to be categorised as 0-7 “normal”, 8-10 “borderline”, >11 “caseness”.  
26 The HADs is well accepted and has strong internal consistency and high test-retest reliability.<sup>31</sup>  
27  
28  
29  
30

31  
32 Self-efficacy will be assessed using the Arthritis Self-Efficacy Scale-8 item (ASES-8),<sup>32</sup> which will  
33 record information about participants’ self-efficacy for pain (2 0-10 NRS), preventing pain & fatigue  
34 interference(2 0-10 NRS), and for other symptoms(4 0-10 NRS). A self-efficacy score, ranging  
35 between 1 and 10, is produced by summing all items and calculating the mean value.<sup>32</sup> Higher scores  
36 indicate better self-efficacy. The ASES-8 has been shown to have good reliability, validity and  
37 sensitivity to change.<sup>32</sup>  
38  
39  
40  
41  
42

43 Cognitive flexibility will be recorded using the Committed Action Questionnaire (CAQ-8), to assess  
44 participants’ abilities to persist with or change behaviour in relation to their present situation<sup>33</sup>. The  
45 CAQ-8 comprises 4 positive, and 4 negative, commitment to action subscales, which are recorded  
46 using 7-point Likert scales. An overall flexibility is scored by reverse coding the negative commitment  
47 subscales and summing all items, with higher scores indicating greater flexibility.<sup>33</sup> The CAQ-8 has  
48 been shown to have good reliability and internal consistency.<sup>33</sup>  
49  
50  
51  
52  
53  
54  
55  
56  
57  
58  
59  
60

| Table 1 – Baseline questionnaire domains and scales            |                                                                                                                                                                                                                                                                                                                                                           |
|----------------------------------------------------------------|-----------------------------------------------------------------------------------------------------------------------------------------------------------------------------------------------------------------------------------------------------------------------------------------------------------------------------------------------------------|
| Domain                                                         | Scales/measurement                                                                                                                                                                                                                                                                                                                                        |
| Demographics                                                   |                                                                                                                                                                                                                                                                                                                                                           |
| Sex                                                            | Tick box – male or female                                                                                                                                                                                                                                                                                                                                 |
| Date of birth                                                  | Day, month, year                                                                                                                                                                                                                                                                                                                                          |
| Height and Weight                                              | Free text (metric or imperial)                                                                                                                                                                                                                                                                                                                            |
| Ethnicity                                                      | Free text                                                                                                                                                                                                                                                                                                                                                 |
| Age left education                                             | Free text                                                                                                                                                                                                                                                                                                                                                 |
| Smoking status                                                 | Tick box – current, ex-, or never smoker                                                                                                                                                                                                                                                                                                                  |
| Occupational status                                            | Tick box – working full time, working part time, student, medically retired, voluntary worker, unemployed but seeking work or retired                                                                                                                                                                                                                     |
| Marital status                                                 | Tick box – Single, in a relationship, co-habiting, married, civil partnership, separated, divorced or widowed                                                                                                                                                                                                                                             |
| Alcohol consumption                                            | Tick box –average units per week: 0, 1-5, 6-10, 11-15, 16-20, 21-40, >40                                                                                                                                                                                                                                                                                  |
| Impact of RA on work                                           | Work productivity question from Work Productivity and Activity Impairment – specific health problem (WPAI-SHP)                                                                                                                                                                                                                                            |
| Postcode                                                       | Free text for first half of postcode                                                                                                                                                                                                                                                                                                                      |
| Belief that sleep affects HRQoL                                | 0-10 NRS: 0 “Not at all likely”, 10 “Very likely”                                                                                                                                                                                                                                                                                                         |
| Information about RA                                           |                                                                                                                                                                                                                                                                                                                                                           |
| Date of RA diagnosis                                           | Month and year                                                                                                                                                                                                                                                                                                                                            |
| Disease activity                                               | Routine Assessment of Patient Index Data 3 (RAPID-3)                                                                                                                                                                                                                                                                                                      |
| Co-morbid rheumatic disease(s) and sleep-related problem(s)    | Check list – osteoarthritis, spondyloarthritis/ankylosing spondylitis, fibromyalgia/chronic widespread pain, gout or other crystal arthritis, Sjogren’s syndrome, restless leg syndrome, obstructive sleep apnoea/snoring, thyroid disorder, diabetes, multiple sclerosis, hypertension.                                                                  |
| Menopausal status                                              | Tick box – yes/no                                                                                                                                                                                                                                                                                                                                         |
| Current medication(s) and non-pharmacological intervention use | Check list – paracetamol, non-steroidal anti-inflammatory drugs (NSAIDs), other analgesics, weak opiates, strong opiates, drugs for neuropathic pain, glucocorticoids, synthetic disease modifying anti-rheumatic drugs (DMARDs), biologic DMARDs, sedatives (or hypnotics), mood stabilisers, antidepressants, other sleep medications.<br>Free-text box |
| Health status information                                      |                                                                                                                                                                                                                                                                                                                                                           |
| Disease specific quality of life                               | Arthritis Impact Measurement Scale 2 - Short Form (AIMS2-SF)                                                                                                                                                                                                                                                                                              |
| Generic Quality of life                                        | WHOQOL-BREF                                                                                                                                                                                                                                                                                                                                               |
| Prioritisation domains for good HRQoL                          | Participants are asked to use a free text box to indicate top 3 things which are most important to them to ensure they have good quality of life.                                                                                                                                                                                                         |
| Sleep quality                                                  | Pittsburgh Sleep Quality Index (PSQI)                                                                                                                                                                                                                                                                                                                     |
| Beliefs about sleep                                            | Dysfunctional Beliefs and Attitudes about Sleep questionnaire (DBAS-16)                                                                                                                                                                                                                                                                                   |
| Insomnia                                                       | Sleep Condition Indicator (SCI)                                                                                                                                                                                                                                                                                                                           |

|                       |                                               |
|-----------------------|-----------------------------------------------|
| Mood                  | Hospital Anxiety and Depression Scale (HADS)  |
| Self-efficacy         | Arthritis Self-Efficacy Scale-8 item (ASES-8) |
| Cognitive flexibility | Committed Action Questionnaire (CAQ-8)        |

### ***Study commences (Day 1)***

On the agreed study start date, participants will receive a text message on the mobile phone number provided during the recruitment process. The reminder text message will ask participants to put on their activity monitor and to download the study app and register for an account. It will also include a study password, which will unlock the app to allow the participant to commence full registration, and a reminder of their QUASARid, which must be entered during the registration process to enable data linkage between the study app, actigraph watch and paper questionnaires.

### ***App installation and account set up***

Instructions about how to download the study app, which can be installed onto the participants' Apple or Android smartphone, tablet or both, will be included within the study pack that will be posted to participants. Once the app is installed participants will be asked to:

- complete a standard registration form (including creation of a username and password)
- enter their unique QUASARid, sex and date of birth, to enable linkage between the study's different data collection platforms

Registrations will be monitored via a live database, held by uMotif, of the data collected by the study app, to which the study team is provided secure access. All data provided by participants using the study app will be immediately transferred to uMotif server and visible in the database in real-time via 3G/4G/ Wifi. Any participants who have not registered with the app on their agreed start date, or within a 5 day window of that date, will be contacted by the study team to understand what issues may have arisen. If appropriate, participation in the study may be rescheduled for a later date.

### ***Data collection***

1  
2  
3 Following app-installation and the completion of the baseline questionnaire, participants will  
4 commence data collection lasting a total of 60 days. The first 30 days of the study comprise the  
5 continuous data collection phase of the study during which time participants wear the actigraph  
6 watch 24 hours a day and complete a once-daily sleep diary and twice daily symptom reports. During  
7 this 30 day monitoring period participants will also complete follow-up questionnaires on days 10,  
8 20 and 30 of the study. No data are recorded between days 31 and 59, but participants are asked to  
9 complete a final follow-up questionnaire on day 60 of the study.  
10  
11  
12  
13  
14  
15  
16

17 During focus groups conducted to inform the design of this study, participants discussed a desire to  
18 have options for on-going support from the study team via telephone contact. For that reason we  
19 will send personalised messages on days 5, 15 and 25 to encourage participation and give the  
20 participant the option to email or telephone the study team if they would like to discuss any issues  
21 or concerns. Any emails or requests for telephone calls will be responded to by the study's post-  
22 doctoral research associate, or principal investigator, at the earliest possible opportunity, and no  
23 later than one working day after the response is received.  
24  
25  
26  
27  
28

29 A full outline of the data collected is provided below.  
30  
31  
32  
33

#### 34 ***Day 1-30 – Actigraph watch and uMotif app***

35  
36  
37 Continuous monitoring of sleep and physical activity.  
38

39 Participants will wear the MotionWatch 8 (MW8; CamNtech, Cambridge, UK) for 24 hours a day over  
40 the 30 days of continuous data collection. The MW8 is a Class I Medical device which conforms to  
41 the essential safety and health requirements and provisions of EC Council Directives 93/42.EEC,  
42 Annex VII. The MW8 requires a standard watch battery (CR2032) which is replaced each time the  
43 watch is used. The configuration of the MW8 for the present study will enable the watch to collect  
44 data for up to 45 days, providing an additional two week window for data to be collected in  
45 instances where study entry may have been delayed.  
46  
47  
48  
49  
50

51 The MW8 monitors limb or bodily movements during daily living and sleep at 30 second time points  
52 (epochs) using a tri-axial accelerometer. It is waterproof for up to 1 hour at 1 meter and is therefore  
53 suitable for use while swimming or showering. Participants are instructed to wear the MW8 on their  
54 non-dominant wrist.  
55  
56  
57

1  
2  
3 Actigraphy has been validated against polysomnography (PSG) data.<sup>34</sup> The MW8 has been shown to  
4 provides reliable estimates for both sleep (including sleep latency, duration, efficiency, and  
5 fragmentation) and physical activity when worn for at least 14 days,<sup>35-37</sup> and has a number of  
6 practical features which make it suitable for the purposes of this study, including an event marker  
7 and prolonged battery life. Furthermore, the MW8 was specifically selected by participants invited  
8 to a research design focus group, who identified the MW8 as their preferred device due to the  
9 comfort of wearing it and the lightweight and unobtrusive design.  
10  
11  
12  
13

14 There is no real-time transmission of actigraphy data because the data are stored on the watches  
15 internal memory and can only be downloaded via a USB connection. It will therefore not be possible  
16 to assess participant compliance until after data collection has been completed and the actigraph  
17 watch is returned.  
18  
19  
20

21 Following the receipt and download of actigraphy data the following variables will be extracted: total  
22 sleep time (the total time spent in sleep according to the epoch-by-epoch wake/sleep  
23 categorisation), sleep onset latency (the time which elapsed between the participant getting into  
24 bed and the participant falling asleep) and sleep efficiency (the total sleep time, expressed as a  
25 proportion of the total times pent in bed). The sleep fragmentation index, a measure of the degree  
26 of sleep discontinuity, will be calculated as a percentage of the total time categorised as mobile in  
27 the epoch-by-epoch mobile/immobile categorisation and the number of immobile bouts which were  
28 less than or equal to one minute in length.  
29  
30  
31  
32  
33  
34

#### 35 Daily symptom reporting

36 During the 30 day continuous data collection, participants will be asked to use the uMotif study app  
37 to report their experience of daily symptoms. Within the app, the unique 'motif' interface is used by  
38 patients to simply track their daily symptoms. The motif which comprises 10 symptom segments,  
39 such as pain severity as is highlighted in **Error! Reference source not found.** The uMotif study app  
40 has been used in multiple ethics-approved studies, capturing over 64 million data points from  
41 patients using their own devices. The uMotif app has been specifically configured to capture the  
42 data required for the QUASAR study.  
43  
44  
45  
46  
47  
48  
49  
50

51 [Figure 2 here]  
52  
53  
54  
55  
56  
57  
58  
59  
60



1  
2  
3 Participants will receive prompts twice daily to complete the symptom ratings, once in the morning  
4 and once in the afternoon/evening. Symptom data are scored on an ordinal scale of 1-5 and are  
5 recorded by touching and sliding the relevant segment within the motif. The symptoms to be  
6 recorded (Table 2) were defined and agreed with consultation of participants in focus groups.<sup>38</sup>  
7  
8

9  
10 Throughout the study participants will receive reminders via the study app to complete the  
11 symptom assessments at 8am and 6pm. Participants will be able to provide additional symptom  
12 reports throughout the day at their discretion.  
13  
14

15  
16  
17  
18  
19  
20  
21  
22  
23  
24  
25  
26  
27  
28  
29  
30  
31  
32  
33  
34  
35  
36  
37  
38  
39  
40  
41  
42  
43  
44  
45  
46  
47  
48  
49  
50  
51  
52  
53  
54  
55  
56  
57  
58  
59  
60

For peer review only

| Symptom         | Question                                                  | Anchor 1 (centre of motif) | Anchor 5 (outside of motif) |
|-----------------|-----------------------------------------------------------|----------------------------|-----------------------------|
| Pain            | How severe is your pain?                                  | No Pain                    | Very Severe Pain            |
| Fatigue         | How severe is your fatigue?                               | No Fatigue                 | Very Severe Fatigue         |
| Mood            | How is your mood?                                         | Depressed                  | Very Happy                  |
| Well-being      | How well do you feel?                                     | Very Well                  | Very Unwell                 |
| Anxiety         | How anxious do you feel?                                  | Very Well                  | Very Anxious                |
| Illness impact  | How much is your illness impacting on your activities?    | No Impact                  | Very Severe Impact          |
| Disease control | How much control do you feel you have over your symptoms? | No Control                 | Very Good Control           |
| Challenge       | How challenging are you finding today?                    | Not Challenging            | Severely Challenging        |
| Sleepiness      | How sleepy do you feel?                                   | Not Sleepy                 | Very Sleepy                 |
| Concentration   | How would you rate your concentration?                    | Poor                       | Excellent                   |

The completion of these symptom data can be continually monitored via a live database, held by uMotif, of the data collected by the study app, to which the study team is provided secure access. As all data provided by participants using the study app are immediately transferred to uMotif server in real-time via 3G/4G/ Wifi, it will be possible for the study team to produce daily reports to monitor whether participants are completing their data in line with the study protocol.

A window of two consecutive days during the 30 day continuous monitoring period will be considered an acceptable period of non-completion for the daily symptom reports, sleep diaries and follow-up questionnaires. After this point, participants will receive a single reminder text message to encourage them to recommence data entry or contact the study team to discuss any concerns or issues, as appropriate.

### ***Day 2-31 – Consensus Sleep Diary***

The reminder sent to participants at 8am will also ask them to complete the 9 item Consensus Sleep Diary (CSD). This diary, which is completed in a separate section of the study app ([figure 3 here]), pertains to the previous night's sleep. To ensure coverage of all 30 nights of actigraphy data collection, it will be completed on the morning of days 2-31. Participants will receive an

1  
2  
3 automatically generated reminder every morning at 8am to complete the CSD, but are able to  
4 complete the diary earlier if they wish.  
5  
6  
7

8  
9 [figure 3 here]  
10

11  
12  
13 The 9 item CSD asks participants to record the time they got into bed, when they tried to sleep, how  
14 long it took to fall asleep, number and duration of night time awakenings, the time of final  
15 awakening, when they got out of bed, sleep quality, and how refreshed they felt upon awakening.  
16 The CSD is widely considered to be a gold-standard sleep diary, having been developed through the  
17 collaboration of sleep experts and potential users.<sup>39,40</sup> An additional 4 items will ask participants to  
18 report the duration of morning stiffness (in minutes), emotional strength, motivation and worry  
19 about sleeping the previous evening.  
20  
21  
22  
23  
24

25 As with the symptom reports, it will be possible to continually monitor sleep diary completion using  
26 the live database, held by uMotif. The study team will therefore produce daily reports to monitor  
27 whether participants are completing their sleep diaries in line with the study protocol. Any  
28 participant who does not complete their sleep diary for more than two days will receive a single  
29 reminder text message to encourage them to recommence data entry or contact the study team to  
30 discuss any concerns or issues, as appropriate. It will not be possible to retrospectively complete the  
31 sleep diaries for missing days.  
32  
33  
34  
35  
36  
37  
38  
39

#### 40 ***Day 10, 20 and 30 – HRQoL, disease activity and life events***

41  
42 A number of follow-up questionnaires will be used throughout the study (Table 3). Prompts to  
43 complete the questionnaires will be sent. Requests to complete the follow-up questionnaires will be  
44 delivered to participants, via the app to participants, on the day they are to be completed when they  
45 open the study app. These reminders will be automatically generated and sent from uMotif and  
46 cannot be personalised. The questionnaires completed at days 10, 20 and 30 will capture the below  
47 items:  
48  
49  
50

- 51
- 52
- 53 • Disease specific quality of life – AIMS2-SF
- 54 • Generic quality of life – WHOQOL-BREF
- 55 • Disease activity - RAPID-3
- 56
- 57

- Occurrence of important events

As with all data collected via the study app, the data recorded in each follow-up questionnaire will be immediately transferred to uMotif server in real-time via 3G/4G/ Wifi. Completion of follow-up questionnaires will be monitored within daily reports produced by the study team and any participant who has not completed their questionnaire within two days of the required date will receive a single reminder text message to request that they complete the questionnaire as soon as possible. Participants will be given instructions to manually access and complete the follow-up questionnaire forms or contact the study team to discuss any concerns or issues, as appropriate.

Following the 30 days of data collection, participants will receive a text message to remind them to stop wearing the activity monitor and to send it back to the study team at the earliest convenient time, using the provided return addressed envelope. The envelopes, to which the relevant postage will be attached to return the package using Royal Mail Signed For® 1<sup>st</sup> Class must be returned via the local postage to obtain proof of postage; participants will not be required to pay any additional postage to obtain this. In instances where the watch does not appear to have been dropped off at the Post Office within 5 days of the expected end date, the study team will contact the participant.

Participants are not expected to continue tracking their symptoms or using the study app for continuous monitoring after day 30 and at this point participants may wish to uninstall the study app. For that reason, as the completion of the study's final questionnaire will occur 30 days after the continuous data collection phase has ended (day 60), participants may no longer be using the app and may have uninstalled it from their devices. Within the text message sent on day 30 of the study to congratulate participants on completing the continuous monitoring phase, participants will be asked to advise the study team if they would like to receive a paper copy of the final follow-up questionnaire.

#### ***Day 60 – Final follow-up questionnaire***

The study's final follow-up questionnaire will be completed at day 60. It is assumed that those who do not request a paper copy will be happy to complete the questionnaire using the app. Participants will be prompted to complete the questionnaire by reminders automatically generated and sent from uMotif. As before these reminders are generic and cannot be personalised.

The questionnaire will capture:

- Disease specific quality of life – AIMS2-SF
- Generic quality of life – WHOQOL-BREF
- Prioritisation of domains - participants asked to use a free text box to indicate the top 3 things which are most important to them to ensure they have good quality of life.
- Disease activity - RAPID-3
- Current medication(s) and non-pharmacological intervention use
- Sleep quality – PSQI
- Occurrence of important events

Table 3– Summary of data collection via study questionnaires.

|                                                                | Pre-registration | Day ≤1 (paper) | Day 10 (app) | Day 20 (app) | Day 30 (app) | Day 60 (app/paper) |
|----------------------------------------------------------------|------------------|----------------|--------------|--------------|--------------|--------------------|
| Screening questionnaire                                        | X                |                |              |              |              |                    |
| Demographics                                                   |                  | X              |              |              |              |                    |
| Information about RA                                           |                  | X              |              |              |              |                    |
| RAPID- 3                                                       |                  | X              | X            | X            | X            | X                  |
| Current medication(s) and non-pharmacological intervention use |                  | X              |              |              |              | X                  |
| AIMS2-SF                                                       |                  | X              | X            | X            | X            | X                  |
| WHOQOL-BREF                                                    |                  | X              | X            | X            | X            | X                  |
| PSQI                                                           |                  | X              |              |              |              | X                  |
| DBAS-16                                                        |                  | X              |              |              |              |                    |
| SCI                                                            |                  | X              |              |              |              |                    |
| HADS                                                           |                  | X              |              |              |              |                    |
| ASES-8                                                         |                  | X              |              |              |              |                    |
| CAQ-8                                                          |                  | X              |              |              |              |                    |

A complete overview of data collection and participant contact is shown in **Error! Reference source not found..**

[Figure 4 here]

*Sample size*

1  
2  
3 Following published guidance,<sup>41,42</sup> A sample size calculation has been conducted to determine a  
4 minimum sample size required to enable the study to conduct structural equation modelling (SEM).  
5 We have based estimated the sample size to detect a conservative minimum effect size (defined as  
6 correlations between pairs of latent variables) of 0.2 (rated as small). Based on our hypothesized  
7 model using baseline and 60 day measurements, containing 13 observed variables and 4 latent  
8 variables, with a significance level of 5% and power of 80%, a minimum sample size of 166  
9 participants is required. Recommended sample sizes for latent growth curve analyses are defined in  
10 relation to the number of participants and the number of repeated observations and suggest a  
11 minimum number of 100 participants should complete at least 3 data points.<sup>43</sup> Our minimum sample  
12 size required and data collection protocol are therefore in excess of the requirements for latent  
13 growth curve analyses. In this study 50 actigraph watches will be obtained. This means that the  
14 maximum capacity for concurrent data collection is 50 and that data collection will be conducted in  
15 waves.

16  
17 Using data from previous studies we conservatively estimate that: a total of 3500 questionnaires  
18 mailed will provide 1750 (50%) returned and completed screening questionnaires, 350 (20%) will  
19 agree to take part and 175 (50%) will provide complete useable data, in excess of the minimum 166  
20 persons required for the analysis. It is important that a representative sample of people with RA is  
21 enrolled into the study. However, Data regarding the characteristics (e.g. age and sex) of persons  
22 who receive information about the study will not be available through the proposed recruitment  
23 channels. The presence of sampling bias will be examined for by comparing the age and sex  
24 distribution of UK population data (Table 4) to a) persons who complete and return screening  
25 questionnaires and b) recruited participants to available.

### 26 27 28 29 30 31 32 33 34 35 36 37 38 39 40 41 42 43 44 *Recruitment*

45  
46 In order to manage the flow of participants into the study and given the limited number of actigraph  
47 watches available, NRAS have agreed to contact mailing list members in 7 regionally-stratified  
48 recruitment waves in order that actigraph watches can be returned by earlier participants, prepared  
49 and sent out to future participants. The dates of each wave are listed below:  
50  
51

52  
53  
54 Wave 1 – 8 May 2017

55 Wave 2 – 17 July 2017  
56  
57

1  
2  
3 Wave 3 – 25 September 2017

4 Wave 4 – 4 December 2017

5 Wave 5 – 12 February 2018

6 Wave 6 – 23 April 2018

7 Wave 7 – 2 July 2018  
8  
9  
10  
11

12 The identification of GP practices and NHS Rheumatology clinics able to support recruitment to the  
13 QUASAR study will occur throughout the study. Once identified, the letters sent to potential  
14 participants identified via the screening of GP records will be sent to coincide with the above mailing  
15 waves used by NRAS. Participants who see information about the study in NHS Rheumatology clinics  
16 will be free to contact the study team at any point, however their enrolment into the study will be  
17 restricted to coincide with the above mailing waves.  
18  
19  
20  
21

### 22 *Targeted recruitment*

23  
24  
25 The study's third objective is to examine whether the relationships between sleep and HRQoL are  
26 moderated by age and sex. It is therefore important to ensure that a representative sample of  
27 people with RA are enrolled into the study. Table 4 displays the estimated UK prevalence of RA and  
28 demonstrates that women are around three times more likely to be affected than men, and the  
29 increased prevalence of RA in older populations.<sup>2</sup>  
30  
31  
32  
33  
34

35 **Table 4- The prevalence of rheumatoid arthritis in the UK**

| 36 Age                 | 37 Males (%) | 38 UK estimate | 39 Females (%) | 40 UK estimate |
|------------------------|--------------|----------------|----------------|----------------|
| 41 16–44               | 42 0.02      | 43 2,500       | 44 0.12        | 45 15,100      |
| 46 45–64               | 47 0.58      | 48 42,900      | 49 1.67        | 50 126,900     |
| 51 65–74               | 52 1.14      | 53 27,100      | 54 2.56        | 55 67,800      |
| 56 75+                 | 57 2.18      | 58 39,100      | 59 2.99        | 60 85,700      |
| Total adult population | 0.44         | 106,500        | 1.16           | 297,600        |

61 From previous studies, we know that young men<sup>44</sup> and older people of both sexes are often under-  
62 represented populations.<sup>41,42</sup> They may be less likely to express an interest in taking part in studies<sup>41</sup>,  
63 or they may be excluded by the inclusion/exclusion criteria used.<sup>42</sup> In anticipation that some of these  
64 'hard to reach' groups may be under-represented in our sample, we propose to monitor the  
65  
66  
67  
68  
69  
70

1  
2  
3 characteristics of participants who are enrolled in the study and apply stratified recruitment  
4 processes in later recruitment waves if required.  
5

#### 6 7 Data analysis plan 8

9  
10 Analyses techniques used in descriptive epidemiology will address aim 1. Data will be presented as  
11 absolute numbers and percentages, presented for the whole group, and stratified by age (18-44; 45-  
12 64; 65-74; 75+), sex and level of socioeconomic deprivation (Index of Multiple Deprivation,<sup>45</sup> derived  
13 using participant postcodes and categorised as quartiles of most deprived, deprived, less deprived  
14 and least deprived).  
15  
16

17  
18 Using structural equation modelling (SEM) and latent trajectory models (LTM) we will address the  
19 studies second aim: to examine if disrupted sleep patterns are associated with poor HRQoL.  
20

21  
22 SEM will assess whether the sleep and sleep/wake rhythm-associated parameters measured at  
23 baseline mediate the association between RAPID3 score and HRQoL at 60 days (the end of the  
24 follow-up period) allowing inter-correlation between the sleep and sleep/wake rhythm-associated  
25 parameters and adjusting for putative confounders. The SEM analysis will be repeated adding to the  
26 model pain, fatigue and mood to assess the effect of on HRQoL (for example **Error! Reference  
27 source not found.**). Finally the analysis will be repeated including the data on mediators collected at  
28 day 30. This will allow assessment of whether RAPID3 predicts change in the mediating factors and  
29 the subsequent impact on HRQoL at day 60. An exploratory multi-group SEM analysis will assess the  
30 moderating effects of age and sex and will thus address the third aim of this study.  
31  
32  
33  
34  
35  
36

37 [Figure 5 here]  
38  
39  
40  
41

42 The SEM analysis assumes that the identified associations are consistent across participants, and  
43 uses only selected time points. Latent trajectory models will utilise all of the repeated measures data  
44 to fully explore the longitudinal relationships between RAPID3, mediators, and HRQoL, and their  
45 variation between participants. First, multilevel growth models, accounting for the clustering of  
46 repeated measures (level 1) within participants (level2), will assess the prospective associations of  
47 RAPID3 with key observed pathways from the SEM analysis, and the prospective associations with  
48 HRQoL. Second, we will assess if distinct clusters of participants can be identified with different  
49 longitudinal courses using dual trajectory latent class growth analysis. We will assess how these  
50 trajectories are associated with change in HRQoL over 60 days and the socio-demographic and  
51 clinical characteristics associated with these different trajectories.  
52  
53  
54  
55  
56  
57



1  
2  
3 Finally, causal mediation analysis methods, specifically the mediational g-formula, will be used to  
4 estimate how successful treatments that improve sleep might be for people with RA. G-formula will  
5 be applied to the SEM models outlined above. This analysis will estimate the potential effect of a  
6 hypothetical intervention targeted at the key causal pathways between the observed variables and  
7 HRQoL. The hypothetical interventions which most improve HRQoL will indicate the best treatment  
8 targets to be tested in future intervention studies. For example, if disrupted circadian pathways  
9 were found to be important drivers of poor QoL, a future study might investigate the impact of  
10 advancing or delaying them using phototherapy<sup>46</sup>. However, it is likely that multiple pathways (e.g.  
11 sleep-wake cycle; sleep-wake cycle and pain) will impact on HRQoL and an intervention “package”  
12 (e.g. phototherapy and behavioural therapy<sup>47</sup>) will need to be developed based on those pathways.  
13  
14  
15  
16  
17  
18  
19  
20  
21

### 22 **Ethics and dissemination:**

23  
24 This study was undertaken a full NHS Research Ethics Committee (REC) review and was allocated to  
25 the National Research Ethics Service (NRES) Committee North West – Liverpool Central REC. The  
26 study was approved by the NRES Committee North West – Liverpool Central REC on 12 April 2017,  
27 reference 17/NW/0217.  
28  
29  
30

31 Results from this study will be disseminated at regional and international conferences and in peer-  
32 reviewed journals. Results will also be disseminated at Patient and Public Engagement (PPE) events  
33 where opportunities arise and are appropriate.  
34  
35  
36

### 37 **Discussion:**

38  
39 People with RA frequently report reduced HRQoL, which may be caused by sleep disturbances. Few  
40 studies have determined the relationship between sleep and quality of life among RA populations  
41 and those which have are laden with methodological challenges, which preclude accurate  
42 assessment and understanding of the relationship between sleep and HRQoL. The QUASAR study is a  
43 comprehensive study which has been designed to overcome these challenges. The results of this  
44 study will inform future intervention studies by answering key questions regarding the link between  
45 sleep and poor HRQoL.  
46  
47  
48  
49  
50  
51  
52  
53  
54  
55  
56  
57  
58  
59  
60

1  
2  
3  
4  
5  
6  
7  
8  
9  
10  
11  
12  
13  
14  
15  
16  
17  
18  
19  
20  
21  
22  
23  
24  
25  
26  
27  
28  
29  
30  
31  
32  
33  
34  
35  
36  
37  
38  
39  
40  
41  
42  
43  
44  
45  
46  
47  
48  
49  
50  
51  
52  
53  
54  
55  
56  
57  
58  
59  
60

For peer review only

## Reference List

1. NICE. Rheumatoid Arthritis: National Clinical Guideline for Management and Treatment in Adults. Clinical guideline [CG79]. 2015. National Institute of Health and Clinical Excellence.
2. Symmons D, Turner G, Webb R, Asten P, Barrett E, Lunt M *et al*. The prevalence of rheumatoid arthritis in the United Kingdom: new estimates for a new century. *Rheumatology* 2002;**41**:793-800.
3. Verstappen SMM, Bijlsma JWJ, Verkleij H, Buskens E, Blaauw AAM, Ter Borg EJ *et al*. Overview of work disability in rheumatoid arthritis patients as observed in cross-sectional and longitudinal surveys. *Arthritis Care & Research* 2004;**51**:488-97.
4. Dominik K, Ahern F, Gold C, Heller D. Health-related quality of life among older adults with arthritis. *Health and quality of life outcomes* 2004;**2**:1-8.
5. Gerhold K, Richter A, Schneider M, Bergerhausen H, Demary W, Liebhaber A *et al*. Health-related quality of life in patients with long-standing rheumatoid arthritis in the era of biologics: data from the German biologics register RABBIT. *Rheumatology* 2015;**54**:1858-66.
6. Geryk L, Carpenter D, Blalock S, DeVillis R, Jordan J. The impact of co-morbidity on health-related quality of life in rheumatoid arthritis and osteoarthritis patients. *Clinical and experimental rheumatology* 2015;**33**:366-74.
7. Drewes AM, Svendesn L, Taagholt SJ, Bjerregard K, Nielsen KD, Hansen B. Sleep in rheumatoid arthritis: a comparison with healthy subjects and studies of sleep/wake interactions. *British Journal of Rheumatology* 1998;**37**:71-81.
8. Roehrs T, Diederichs C, Gillis M, Burger A, Stout R, Lumley M *et al*. Nocturnal sleep, daytime sleepiness and fatigue in fibromyalgia patients compared to rheumatoid arthritis patients and healthy controls: a preliminary study. *Sleep Medicine* 2013;**14**:109-15.
9. Crosby LJ. Factors which contribute to fatigue associated with rheumatoid arthritis. *Journal of advanced nursing* 1991;**16**:974-81.
10. Wolfe F, Walitt BT, Katz RS, Hauser W. Symptoms, the nature of fibromyalgia, and diagnostic and statistical manual 5 (DSM-5) defined mental illness in patients with rheumatoid arthritis and fibromyalgia. *PLoS One* 2014;**14**:e88740.
11. Lee YC, Chibnik LB, Lu B, Wasan AD, Edwards RR, Fossel AH *et al*. The relationship between disease activity, sleep, psychiatric distress and pain sensitivity in rheumatoid arthritis: a cross-sectional study. *Arthritis research & therapy* 2009;**11**:1-11.
12. Lautenbacher S, Kundermann B, Krieg J. Sleep deprivation and pain perception. *Sleep Medicine Reviews* 2006;**10**:357-69.
13. Goodchild CE, Treharne GJ, Booth DA, Bowman SJ. Daytime patterning of fatigue and its associations with the previous night's discomfort and poor sleep among women with primary Sjögren's syndrome or rheumatoid arthritis. *Musculoskeletal Care* 2010;**8**:107-17.

14. Irwin MR, Olmstead R, Carrillo C, Sadeghi N, Fitzgerald JD, Ranganath VK *et al.* Sleep loss exacerbates fatigue, depression, and pain in rheumatoid arthritis. *Sleep* 2012;**35**:537-43.
15. Sariyildiz MA, Batmaz I, Bozkurt M, Bez Y, Centincakmak MG, Yazmalar L *et al.* Sleep Quality in Rheumatoid Arthritis: Relationship Between the Disease Severity, Depression, Functional Status and the Quality of Life. *Journal of Clinical Medicine Research* 2014;**6**:44-52.
16. Purabdollah M, Lakdizaji S, Rahmani A, Hajalilu M, Ansarin K. Relationship between Sleep Disorders, Pain and Quality of Life in Patients with Rheumatoid Arthritis. *Journal of Caring Sciences* 2015;**4**:233-41.
17. Goes ACJ, Reis LAB, Silva MBG, Kahlow BS, Skare TL. Rheumatoid arthritis and sleep quality. *Revista Brasileira de Reumatologia (English Edition)* 2017;**57**:294-8.
18. Guo G, Fu T, Yin R, Zhang L, Zhang Q, Xia Y *et al.* Sleep quality in Chinese patients with rheumatoid arthritis: contributing factors and effects on health-related quality of life. *Health and quality of life outcomes* 2016;**14**:151.
19. Tafti M. Genetic aspects of normal and disturbed sleep . *Sleep Medicine* 2009;**10**:S17-S21.
20. Buysse DJ, Ancoli-Israel S, Edinger JD, Lichstein KL, Morin CM. Recommendations for a standard research assessment of insomnia. *Sleep: Journal of Sleep and Sleep Disorders Research* 2006;**29**:1155-73.
21. Buysse DJ. Sleep health: can we define it? Does it matter? *Sleep* 2014;**37**:9-17.
22. Muller S, Hider SL, Raza K, Stack RJ, Hayward RA, Mallen CD. An algorithm to identify rheumatoid arthritis in primary care: a Clinical Practice Research Datalink study. *BMJ open* 2015;**5**:e009309.
23. Anderson J, Caplan L, Yazdany J, Robbins ML, Neogi T, Michaud K *et al.* Rheumatoid arthritis disease activity measures: American College of Rheumatology recommendations for use in clinical practice. *Arthritis Care & Research* 2012;**64**:640-7.
24. Espie CA, Kyle SD, Hames P, Gardani M, Fleming L, Cape J. The Sleep Condition Indicator: a clinical screening tool to evaluate insomnia disorder. *BMJ open* 2014;**4**:e004183.
25. Scott DL, Garrood T. Quality of life measures: use and abuse. *Bailliere's Clinical Rheumatology* 2000;**14**:663-87.
26. World Health Organisation. Programme on Mental Health: WHOQOL user manual. 2012.
27. Gignac MAM, Cao X, McAlpine J, Badley EM. Arthritis Impact Measurement Scales 2 (AIMS2), Arthritis Impact Measurement Scales 2-Short Form (AIMS2-SF), The Organization for Economic Cooperation and Development (OECD) Long-Term Disability (LTD) Questionnaire, EQ-5D, World Health Organization Disability Assessment Schedule II (WHODASII), Late-Life Function and Disability Instrument (LLFDI), and Late-Life Function and Disability Instrument-Abbreviated Version (LLFDI-Abbreviated) Measures of Disability. *Arthritis Care & Research* 2011;**63**:S308-S324.

- 1
  - 2
  - 3
  - 4
  - 5
  - 6
  - 7
  - 8
  - 9
  - 10
  - 11
  - 12
  - 13
  - 14
  - 15
  - 16
  - 17
  - 18
  - 19
  - 20
  - 21
  - 22
  - 23
  - 24
  - 25
  - 26
  - 27
  - 28
  - 29
  - 30
  - 31
  - 32
  - 33
  - 34
  - 35
  - 36
  - 37
  - 38
  - 39
  - 40
  - 41
  - 42
  - 43
  - 44
  - 45
  - 46
  - 47
  - 48
  - 49
  - 50
  - 51
  - 52
  - 53
  - 54
  - 55
  - 56
  - 57
  - 58
  - 59
  - 60
28. Mollayeva T, Thurairajah P, Burton K, Mollayeva S, Shapiro CM, Colantonio S. The Pittsburgh sleep quality index as a screening tool for sleep dysfunction in clinical and non-clinical samples: A systematic review and meta-analysis. *Sleep Medicine Reviews* 2016;**25**:52-73.
29. Buysse DJ, Reynolds CF, Monk TH, Berman SR, Kupfer DJ. The Pittsburgh Sleep Quality Index: a new instrument for psychiatric practice and research. *Psychiatry research* 1989;**28**:193-213.
30. Morin CM, Vallieres A, Ivers H. Dysfunctional beliefs and attitudes about sleep (DBAS): validation of a brief version (DBAS-16). *Sleep* 2007;**30**:1547.
31. Herrmann C. International experiences with the Hospital Anxiety and Depression Scale—a review of validation data and clinical results. *Journal of psychosomatic research* 1997;**42**:17-41.
32. Brady TJ. Measures of self-efficacy: Arthritis Self-Efficacy Scale (ASES), Arthritis Self-Efficacy Scale—8 Item (ASES—8), Children's Arthritis Self-Efficacy Scale (CASE), Chronic Disease Self-Efficacy Scale (CDSSES), Parent's Arthritis Self-Efficacy Scale (PASE), and Rheumatoid Arthritis Self-Efficacy Scale (RASE). *Arthritis Care & Research* 2011;**63**:S473-S485.
33. McCracken LM, Chilcot J, Norton S. Further development in the assessment of psychological flexibility: a shortened Committed Action Questionnaire (CAQ-8). *European journal of pain* 2015;**19**:677-85.
34. Sadaka Y, Sadeh A, Bradbury L, Massicotte C, Zak M, Go C *et al*. Validation of actigraphy with continuous video-electroencephalography in children with epilepsy. *Sleep Medicine* 2014;**15**:1075-81.
35. Falck RD, Landry GJ, Brazendale K, Liu-Ambrose T. Measuring Physical Activity in Older Adults Using MotionWatch 8 Actigraphy: How Many Days are Needed? *Journal of Aging and Physical Activity* 2017;**25**:51-7.
36. Landry GJ, Best JR, Liu-Ambrose T. Measuring sleep quality in older adults: a comparison using subjective and objective methods. *Frontiers in Aging Neuroscience* 2015;**7**:166.
37. Elbaz M, Yauy K, Metlaine A, Martoni M, Leger D. Validation of a new actigraph motion watch versus polysomnography on 70 healthy and suspected sleep-disordered subjects. *Journal of Sleep Research* 2012;**21**:218.
38. Short V, McBeth J, Druce KL, Moore S, Dixon WG, Kyle SD *et al*. Fluctuating, unpredictable and challenging: how pain, fatigue and sleep disturbance impact on quality of life in people with rheumatoid arthritis. *Annals of the rheumatic diseases* 2017;**76**.
39. Maich KH, Lachowski AM, Carney CE. Psychometric Properties of the Consensus Sleep Diary in Those With Insomnia Disorder. *Behavioral sleep medicine* 2016;1-18.
40. Carney CE, Buysse DJ, Ancoli-Israel S, Edinger JD, Krystal AD, Lichstein KL *et al*. The Consensus Sleep Diary: Standardizing Prospective Sleep Self-Monitoring. *Sleep* 2012;**35**:287-302.
41. Westland JC. Lower bounds on sample size in structural equation modeling. *Electronic Commerce Research and Applications* 2010;**9**:476-87.
42. Soper, D. S. A-priori Sample Size Calculator for Structural Equation Models (Online Software). 2012.

- 1  
2  
3 43. Curran PJ, Obeidat K, Losardo D. Twelve Frequently Asked Questions About Growth Curve  
4 Modeling. *Journal of Cognition and Development* 2010;**11**:121-36.  
5  
6 44. Druce KL, McBeth J, van der Veer SN, Selby DA, Vidgen B, Georgatzis K *et al.* Recruitment and  
7 ongoing engagement in a UK smartphone study examining the association between weather  
8 and pain . *JMIR* 2017;**5**:e168.  
9  
10 45. Department of the Environment, Transport and the regions. Indices of deprivation 2000.  
11 2000.  
12  
13  
14 46. Dodson ER, Zee PC. Therapeutics for Circadian Rhythm Sleep Disorders. *Sleep Medicine Clinics*  
15 2010;**5**:701-15.  
16  
17 47. Ashburn MA, Staats PS. Management of chronic pain. *The Lancet* 1999;**353**:1865-9.  
18  
19  
20  
21  
22  
23  
24  
25  
26  
27  
28  
29  
30  
31  
32  
33  
34  
35  
36  
37  
38  
39  
40  
41  
42  
43  
44  
45  
46  
47  
48  
49  
50  
51  
52  
53  
54  
55  
56  
57  
58  
59  
60

1  
2  
3 Authors contributions:

4 JM led the conception and design of the study.

5 KLD, LC, VS, SM, BH, BJ, ML, DSK, WGD and JM made substantial contributions to the conception and  
6 design of the study.

7 JM and ML planned the statistical analysis.

8 KLD wrote the first draft of the protocol manuscript.

9 LC, VS, SM, BH, BJ, ML, DSK, WGD and JM critically reviewed the protocol manuscript.

10 KLD, LC, VS, SM, BH, BJ, ML, DSK, WGD and JM approved the final version of the document.  
11  
12

13  
14 Data sharing statement: We intend to make data available for data sharing after the data collection  
15 has been completed and the primary aims of the study are met.  
16

17  
18 Funding statement: This study is supported by Arthritis Research UK grant number 21188. The study  
19 is also supported by infrastructure support from the Arthritis Research UK Centre for Epidemiology  
20 (grant reference 20380).  
21  
22

23  
24 Competing interests statement: The authors have no competing interests to disclose  
25  
26  
27  
28

29 Figure legends:

30  
31 *Figure 1 – Flow of participant entry into the study*

32  
33 *Figure 2 - Screenshot of uMotif study app*

34  
35 *Figure 3 – Screenshot of consensus sleep diary within study app*

36  
37 *Figure 4 - Data collection and participant contact across 60 days for participants enrolled in QUASAR*

38  
39 *Figure 5 – Hypothetical model of the pathways of relationship between rheumatoid arthritis and*  
40 *quality of life disease severity, sleep, fatigue, mood, and pain– simple model. In this figure rectangles*  
41 *represent observed variables, and circles represent the constructs those variables represent. Solid*  
42 *arrows represent the pathways to be tested. RAPID-3: Routine Assessment of Patient Index Data 3,*  
43 *CSD: Consensus Sleep Diary, PSQI: Pittsburgh Sleep Quality Index, AIMS2-SF: Arthritis Impact*  
44 *Measurement Scale 2 - Short Form.*  
45  
46  
47  
48  
49  
50  
51  
52  
53  
54  
55  
56  
57  
58  
59  
60

1  
2  
3  
4  
5  
6  
7  
8  
9  
10  
11  
12  
13  
14  
15  
16  
17  
18  
19  
20  
21  
22  
23  
24  
25  
26  
27  
28  
29  
30  
31  
32  
33  
34  
35  
36  
37  
38  
39  
40  
41  
42  
43  
44  
45  
46  
47  
48  
49  
50  
51  
52  
53  
54  
55  
56  
57  
58  
59  
60



Figure 1 – Flow of participant entry into the study

254x190mm (300 x 300 DPI)



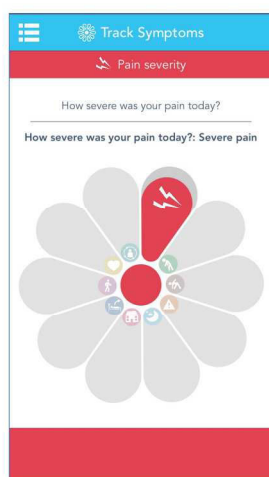

Figure 2 - Screenshot of uMotif study app

254x190mm (300 x 300 DPI)

1  
2  
3  
4  
5  
6  
7  
8  
9  
10  
11  
12  
13  
14  
15  
16  
17  
18  
19  
20  
21  
22  
23  
24  
25  
26  
27  
28  
29  
30  
31  
32  
33  
34  
35  
36  
37  
38  
39  
40  
41  
42  
43  
44  
45  
46  
47  
48  
49  
50  
51  
52  
53  
54  
55  
56  
57  
58  
59  
60



Figure 3 – Screenshot of consensus sleep diary within study app

254x190mm (300 x 300 DPI)

Peer review only



Figure 4 - Data collection and participant contact across 60 days for participants enrolled in QUASAR

254x190mm (300 x 300 DPI)

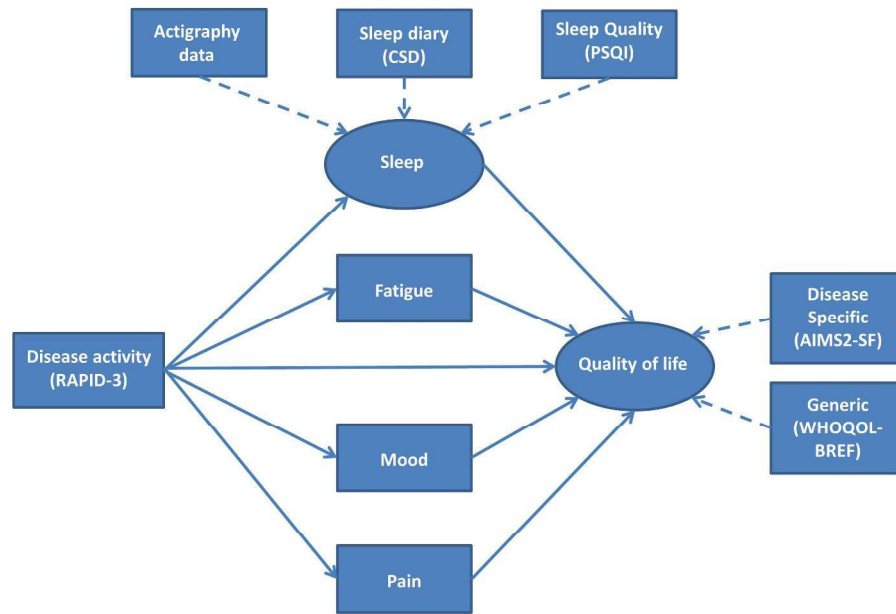

Figure 5 – Hypothetical model of the pathways of relationship between rheumatoid arthritis and quality of life disease severity, sleep, fatigue, mood, and pain– simple model. In this figure rectangles represent observed variables, and circles represent the constructs those variables represent. Solid arrows represent the pathways to be tested. RAPID-3: Routine Assessment of Patient Index Data 3, CSD: Consensus Sleep Diary, PSQI: Pittsburgh Sleep Quality Index, AIMS2-SF: Arthritis Impact Measurement Scale 2 - Short Form.

254x190mm (300 x 300 DPI)
